# Supplementary material for: Public Health Interventions to Improve Antimicrobial Resistance Awareness and Behavioural Change Associated with Antimicrobial Use: A Systematic Review Exploring the Use of Social Media
Source: MDPI journal article supplement (doi:10.3390/antibiotics11050669), 2022-05-16
Supplement: s1 [file s1]

# File S1. Evidence search report in electronic databases

| Electronic search report No. 1 |                                                                                                                                                                                                                                                                                                                                                                                                                                                                                                                                                                                                                                                                                                                                                                                                                                                                                                                                                                                                                                                                                                                                                                                                                                                                                                                                                                                                                                                                                                                                                                                                                                                                                                                                                                                                                                                                                                                                                                                                                                                                                                                                                                                               |
|--------------------------------|-----------------------------------------------------------------------------------------------------------------------------------------------------------------------------------------------------------------------------------------------------------------------------------------------------------------------------------------------------------------------------------------------------------------------------------------------------------------------------------------------------------------------------------------------------------------------------------------------------------------------------------------------------------------------------------------------------------------------------------------------------------------------------------------------------------------------------------------------------------------------------------------------------------------------------------------------------------------------------------------------------------------------------------------------------------------------------------------------------------------------------------------------------------------------------------------------------------------------------------------------------------------------------------------------------------------------------------------------------------------------------------------------------------------------------------------------------------------------------------------------------------------------------------------------------------------------------------------------------------------------------------------------------------------------------------------------------------------------------------------------------------------------------------------------------------------------------------------------------------------------------------------------------------------------------------------------------------------------------------------------------------------------------------------------------------------------------------------------------------------------------------------------------------------------------------------------|
| Electronic database            | MEDLINE(R) ALL 1946 to 27 April, 2022                                                                                                                                                                                                                                                                                                                                                                                                                                                                                                                                                                                                                                                                                                                                                                                                                                                                                                                                                                                                                                                                                                                                                                                                                                                                                                                                                                                                                                                                                                                                                                                                                                                                                                                                                                                                                                                                                                                                                                                                                                                                                                                                                         |
| Platform                       | OVID                                                                                                                                                                                                                                                                                                                                                                                                                                                                                                                                                                                                                                                                                                                                                                                                                                                                                                                                                                                                                                                                                                                                                                                                                                                                                                                                                                                                                                                                                                                                                                                                                                                                                                                                                                                                                                                                                                                                                                                                                                                                                                                                                                                          |
| Date of search                 | 27-04-2022                                                                                                                                                                                                                                                                                                                                                                                                                                                                                                                                                                                                                                                                                                                                                                                                                                                                                                                                                                                                                                                                                                                                                                                                                                                                                                                                                                                                                                                                                                                                                                                                                                                                                                                                                                                                                                                                                                                                                                                                                                                                                                                                                                                    |
| Restriction of language        | None                                                                                                                                                                                                                                                                                                                                                                                                                                                                                                                                                                                                                                                                                                                                                                                                                                                                                                                                                                                                                                                                                                                                                                                                                                                                                                                                                                                                                                                                                                                                                                                                                                                                                                                                                                                                                                                                                                                                                                                                                                                                                                                                                                                          |
| Other limits                   | None                                                                                                                                                                                                                                                                                                                                                                                                                                                                                                                                                                                                                                                                                                                                                                                                                                                                                                                                                                                                                                                                                                                                                                                                                                                                                                                                                                                                                                                                                                                                                                                                                                                                                                                                                                                                                                                                                                                                                                                                                                                                                                                                                                                          |
| Search strategy (results)      | <p>1 (superbug* or superinfection*).ti,ab. 6574</p> <p>2 *Superinfection/ 1202</p> <p>3 (multiresistan* or multi-resistan* or MDR or MDRO or AMR).ti,ab. 38866</p> <p>4 ((drug* or multidrug or multi-drug or antimicrobial* or anti-microbial* or antiinfection* or anti-infection* or antibacterial* or anti-bacterial* or antibiotic* or anti-biotic*) adj4 (resistan* or toleran*)).ti,ab. 245122</p> <p>5 *Drug Resistance/ 11448</p> <p>6 *Drug Resistance, Microbial/ 15381</p> <p>7 *Drug Resistance, Multiple/ 7520</p> <p>8 *Drug Tolerance/ 4156</p> <p>9 (r factor* or resistant factor*).ti,ab. 4007</p> <p>10 *R Factors/ 2780</p> <p>11 ((antimicrobial or anti-microbial or antiinfection or anti-infection or antibacterial or anti-bacterial or antibiotic or anti-biotic) adj4 stewardship).ti,ab. 6902</p> <p>12 *Anti-Infective Agents/ 42767</p> <p>13 *Anti-Bacterial Agents/ 230652</p> <p>14 1 or 2 or 3 or 4 or 5 or 6 or 7 or 8 or 9 or 10 or 11 or 12 or 13 507496</p> <p>15 (public or population or community or citizen* or household* or resident* or consumer* or carer* or caregiver* or people or adult* or men or women or mother* or father* or parent* or student* or pupil* or children or adolescent* or teenager*).ti,ab. 6313316</p> <p>16 *Caregivers/ 30081</p> <p>17 *Men/ 2310</p> <p>18 *Women/ 11642</p> <p>19 *Parents/ 38773</p> <p>20 *Fathers/ 5573</p> <p>21 *Mothers/ 30706</p> <p>22 *Students/ 38353</p> <p>23 15 or 16 or 17 or 18 or 19 or 20 or 21 or 22 6328222</p> <p>24 *Program Evaluation/ 11469</p> <p>25 ((behavio#r adj3 (change* or changing or alter* or modification* or modify or modifying or modifies or modified)) or intention*).ti,ab. 114721</p> <p>26 *Motivation/ 31549</p> <p>27 *Intention/ 6774</p> <p>28 (attitude* or belief* or view* or opinion* or expectation* or anticipat* regret or knowledge or awareness or health literacy or risk perception* or perceived risk* or perceived susceptibility or illness perception* or treatment perception*).ti,ab. 1752751</p> <p>29 *Attitude to Health/ 43877</p> <p>30 *Health Knowledge, Attitudes, Practice/ 67995</p> <p>31 *Health Literacy/ 6108</p> |

|                                       |                                                                                                                                                                                                                                                                                                                                                                                                                                                                                                                                                                                                                                                                                                                                                                                                                                                                                                                                                                                                                                                                                                                                                                                                                                                                                                                                                                                                                                                                                                                                                                                                                                                                                                                                                                                                                                                                                                                                                                                                                                                                      |
|---------------------------------------|----------------------------------------------------------------------------------------------------------------------------------------------------------------------------------------------------------------------------------------------------------------------------------------------------------------------------------------------------------------------------------------------------------------------------------------------------------------------------------------------------------------------------------------------------------------------------------------------------------------------------------------------------------------------------------------------------------------------------------------------------------------------------------------------------------------------------------------------------------------------------------------------------------------------------------------------------------------------------------------------------------------------------------------------------------------------------------------------------------------------------------------------------------------------------------------------------------------------------------------------------------------------------------------------------------------------------------------------------------------------------------------------------------------------------------------------------------------------------------------------------------------------------------------------------------------------------------------------------------------------------------------------------------------------------------------------------------------------------------------------------------------------------------------------------------------------------------------------------------------------------------------------------------------------------------------------------------------------------------------------------------------------------------------------------------------------|
|                                       | <p>32 (perceived behavior#ral control or autonomy or capacity or self-efficacy or competen* or confidence or ability or skill*).ti,ab. 2359205</p> <p>33 *Self Efficacy/ 9486</p> <p>34 (perceived norm* or injunctive norm* or subjective norm* or descriptive norm* or moral norm* or self-identity).ti,ab. 5189</p> <p>35 *Social Norms/ 1043</p> <p>36 ((medication* or drug* or antimicrobial* or anti-microbial* or antiinfection* or anti-infection* or antibacterial* or anti-bacterial* or antibiotic* or anti-biotic*) adj4 (use* or consumption or purchas* or dispos* or storage or storing or sharing or shared or expect* or request*).ti,ab. 355693</p> <p>37 ((inappropriat* or irrational or imprudent or unnecessar* or irresponsibl* or misuse* or improper* or mistake* or indiscriminat* or suboptimum* or bad or overuse* or excessiv* or vary or varied or variation or poor or unsafe*) adj4 (use* or utili?e or treatment or consumption or purchas* or dispos* or storage or sharing or shared or expectation* or request*).ti,ab. 98333</p> <p>38 ((appropriat* or rational or prudent or judicious* or optimal* or correct or proper* or responsibl* or safe* or good or decreas* or limit* or curb* or minimi?e* or minimal* or lessen* or curtail* or abate* or restrict* or lower* or discontinue* or delay*) adj4 (use* or utili?e or treatment or consumption or purchas* or dispos or storage or sharing or shared or expectation* or request*).ti,ab. 721908</p> <p>39 *Drug-Seeking Behavior/ 1094</p> <p>40 (compliance or concordance or adherence).ti,ab. 306305</p> <p>41 *Medication Adherence/ 13883</p> <p>42 (self-car* or self-manag* or self-monitor* or self-medicat*).ti,ab. 54554</p> <p>43 *Self Care/ 19294</p> <p>44 *Self Medication/2335</p> <p>45 44 or 45 or 46 or 47 or 48 or 49 or 50 or 51 or 52 or 53 or 54 or 55 or 56 or 57 or 58 or 59 or 60 or 61 or 62 or 63 or 64 5109261</p> <p>46 Telegram.ti,ab. 130</p> <p>47 reddit.ti,ab. 321</p> <p>48 46 or 47 451</p> <p>49 14 and 23 and 45 and 48 0</p> |
| <b>Number of references found</b>     | 0                                                                                                                                                                                                                                                                                                                                                                                                                                                                                                                                                                                                                                                                                                                                                                                                                                                                                                                                                                                                                                                                                                                                                                                                                                                                                                                                                                                                                                                                                                                                                                                                                                                                                                                                                                                                                                                                                                                                                                                                                                                                    |
| <b>Electronic search report No. 2</b> |                                                                                                                                                                                                                                                                                                                                                                                                                                                                                                                                                                                                                                                                                                                                                                                                                                                                                                                                                                                                                                                                                                                                                                                                                                                                                                                                                                                                                                                                                                                                                                                                                                                                                                                                                                                                                                                                                                                                                                                                                                                                      |
| <b>Electronic database</b>            | Embase                                                                                                                                                                                                                                                                                                                                                                                                                                                                                                                                                                                                                                                                                                                                                                                                                                                                                                                                                                                                                                                                                                                                                                                                                                                                                                                                                                                                                                                                                                                                                                                                                                                                                                                                                                                                                                                                                                                                                                                                                                                               |
| <b>Platform</b>                       | Elsevier                                                                                                                                                                                                                                                                                                                                                                                                                                                                                                                                                                                                                                                                                                                                                                                                                                                                                                                                                                                                                                                                                                                                                                                                                                                                                                                                                                                                                                                                                                                                                                                                                                                                                                                                                                                                                                                                                                                                                                                                                                                             |
| <b>Date of search</b>                 | 27-04-2022                                                                                                                                                                                                                                                                                                                                                                                                                                                                                                                                                                                                                                                                                                                                                                                                                                                                                                                                                                                                                                                                                                                                                                                                                                                                                                                                                                                                                                                                                                                                                                                                                                                                                                                                                                                                                                                                                                                                                                                                                                                           |
| <b>Restriction of language</b>        | None                                                                                                                                                                                                                                                                                                                                                                                                                                                                                                                                                                                                                                                                                                                                                                                                                                                                                                                                                                                                                                                                                                                                                                                                                                                                                                                                                                                                                                                                                                                                                                                                                                                                                                                                                                                                                                                                                                                                                                                                                                                                 |
| <b>Other limits</b>                   | None                                                                                                                                                                                                                                                                                                                                                                                                                                                                                                                                                                                                                                                                                                                                                                                                                                                                                                                                                                                                                                                                                                                                                                                                                                                                                                                                                                                                                                                                                                                                                                                                                                                                                                                                                                                                                                                                                                                                                                                                                                                                 |
| <b>Search strategy (results)</b>      | <p>1 superbug*:ti,ab OR superinfection*:ti,ab (8714)</p> <p>2 'superinfection'/mj (1970)</p> <p>3 multiresistan*:ti,ab OR 'multi resistan*':ti,ab OR mdr:ti,ab OR mdro:ti,ab OR amr:ti,ab (54977)</p> <p>4 ((drug* OR multidrug OR 'multi-drug' OR antimicrobial* OR 'anti-microbial*' OR antiinfection* OR 'anti-infection*' OR antibacterial* OR 'anti-bacterial*' OR antibiotic* OR 'anti-biotic*') NEXT/4 (resistan* OR toleran*)):ti,ab (284232)</p> <p>5 'drug resistance'/mj (32388)</p>                                                                                                                                                                                                                                                                                                                                                                                                                                                                                                                                                                                                                                                                                                                                                                                                                                                                                                                                                                                                                                                                                                                                                                                                                                                                                                                                                                                                                                                                                                                                                                      |

|  |                                                                                                                                                                                                                                                                                                                                                                                                                                                                                                                                                                                                                                                                                                                                                                                                                                                                                                                                                                                                                                                                                                                                                                                                                                                                                                                                                                                                                                                                                                                                                                                                                                                                                                                                                                                                                                                                                                                                                                                                                                                                                                                                                                                                                                                                                                                                                                                                                                                                                                                                                                                                                                                                                                                                                                                    |
|--|------------------------------------------------------------------------------------------------------------------------------------------------------------------------------------------------------------------------------------------------------------------------------------------------------------------------------------------------------------------------------------------------------------------------------------------------------------------------------------------------------------------------------------------------------------------------------------------------------------------------------------------------------------------------------------------------------------------------------------------------------------------------------------------------------------------------------------------------------------------------------------------------------------------------------------------------------------------------------------------------------------------------------------------------------------------------------------------------------------------------------------------------------------------------------------------------------------------------------------------------------------------------------------------------------------------------------------------------------------------------------------------------------------------------------------------------------------------------------------------------------------------------------------------------------------------------------------------------------------------------------------------------------------------------------------------------------------------------------------------------------------------------------------------------------------------------------------------------------------------------------------------------------------------------------------------------------------------------------------------------------------------------------------------------------------------------------------------------------------------------------------------------------------------------------------------------------------------------------------------------------------------------------------------------------------------------------------------------------------------------------------------------------------------------------------------------------------------------------------------------------------------------------------------------------------------------------------------------------------------------------------------------------------------------------------------------------------------------------------------------------------------------------------|
|  | <p>6 'antibiotic resistance'/mj (67487)</p> <p>7 'multidrug resistance'/mj (17941)</p> <p>8 'drug tolerance'/mj (11084)</p> <p>9 'r factor':ti,ab OR 'resistant factor':ti,ab (4007)</p> <p>10 'r factor'/mj (2891)</p> <p>11 ((antimicrobial OR 'anti-microbial' OR antiinfection OR 'anti-infection' OR antibacterial OR 'anti-bacterial' OR antibiotic OR 'antibiotic') NEXT/4 stewardship):ti,ab (11054)</p> <p>12 'antiinfective agent'/mj (106,926)</p> <p>13 'antibiotic therapy'/mj (19,049)</p> <p>14 #1 OR #2 OR #3 OR #4 OR #5 OR #6 OR #7 OR #8 OR #9 OR #10 OR #11 OR #12 OR #13 (487,646)</p> <p>15 public:ti,ab OR population:ti,ab OR community:ti,ab OR citizen*:ti,ab OR household*:ti,ab OR resident*:ti,ab OR consumer*:ti,ab OR carer*:ti,ab OR caregiver*:ti,ab OR people:ti,ab OR adult*:ti,ab OR men:ti,ab OR women:ti,ab OR mother*:ti,ab OR father*:ti,ab OR parent*:ti,ab OR student*:ti,ab OR pupil*:ti,ab OR children:ti,ab OR adolescent*:ti,ab OR teenager*:ti,ab (8,603,296)</p> <p>16 'caregiver'/mj (26,400)</p> <p>17 'male'/mj (49,402)</p> <p>18 'female'/mj (96,829)</p> <p>19 'parent'/mj (22,082)</p> <p>20 'father'/mj (4213)</p> <p>21 'mother'/mj (22,419)</p> <p>22 'student'/mj (29,442)</p> <p>23 #15 OR #16 OR #17 OR #18 OR #19 OR #20 OR #21 OR #22 (8,651,809)</p> <p><b>24 telegram:ti,ab OR reddit:ti,ab (645)</b></p> <p>25 'program evaluation'/mj (2572)</p> <p>26 ((behavio\$r NEXT/3 (change* OR changing OR alter* OR modification* OR modify OR modifying OR modifies OR modified)):ti,ab) OR intention*:ti,ab (168,030)</p> <p>27 'motivation'/mj (33,095)</p> <p>28 'behavior'/mj (70,764)</p> <p>29 attitude*:ti,ab OR belief*:ti,ab OR view*:ti,ab OR opinion*:ti,ab OR expectation*:ti,ab OR 'anticipat* regret':ti,ab OR knowledge:ti,ab OR awareness:ti,ab OR 'health literacy':ti,ab OR 'risk perception*':ti,ab OR 'perceived risk*':ti,ab OR 'perceived susceptibility':ti,ab OR 'illness perception*':ti,ab OR 'treatment perception*':ti,ab (2,275,676)</p> <p>30 'attitude to health'/mj (62,595)</p> <p>31 'health literacy'/mj (6801)</p> <p>32 'perceived behavio\$ral control':ti,ab OR autonomy:ti,ab OR capacity:ti,ab OR 'self-efficacy':ti,ab OR competen*:ti,ab OR confidence:ti,ab OR ability:ti,ab OR skill*:ti,ab (2,980,962)</p> <p>33 'self concept'/mj (32,649)</p> <p>34 'perceived norm*':ti,ab OR 'injunctive norm*':ti,ab OR 'subjective norm*':ti,ab OR 'descriptive norm*':ti,ab OR 'moral norm*':ti,ab OR 'self-identity':ti,ab (6131)</p> <p>35 'social norm'/mj (1179)</p> <p>36 ((medication* OR drug* OR antimicrobial* OR 'anti-microbial*' OR antiinfection* OR 'anti-infection*' OR antibacterial* OR 'anti-bacterial*' OR antibiotic* OR 'anti-biotic*') NEXT/4 (use* OR</p> |
|--|------------------------------------------------------------------------------------------------------------------------------------------------------------------------------------------------------------------------------------------------------------------------------------------------------------------------------------------------------------------------------------------------------------------------------------------------------------------------------------------------------------------------------------------------------------------------------------------------------------------------------------------------------------------------------------------------------------------------------------------------------------------------------------------------------------------------------------------------------------------------------------------------------------------------------------------------------------------------------------------------------------------------------------------------------------------------------------------------------------------------------------------------------------------------------------------------------------------------------------------------------------------------------------------------------------------------------------------------------------------------------------------------------------------------------------------------------------------------------------------------------------------------------------------------------------------------------------------------------------------------------------------------------------------------------------------------------------------------------------------------------------------------------------------------------------------------------------------------------------------------------------------------------------------------------------------------------------------------------------------------------------------------------------------------------------------------------------------------------------------------------------------------------------------------------------------------------------------------------------------------------------------------------------------------------------------------------------------------------------------------------------------------------------------------------------------------------------------------------------------------------------------------------------------------------------------------------------------------------------------------------------------------------------------------------------------------------------------------------------------------------------------------------------|

|                                       |                                                                                                                                                                                                                                                                                                                                                                                                                                                                                                                                                                                                                                                                                                                                                                                                                                                                                                                                                                                                                                                                                                                                                                                                                                                                                                                                                                                                                                                                                                                                           |
|---------------------------------------|-------------------------------------------------------------------------------------------------------------------------------------------------------------------------------------------------------------------------------------------------------------------------------------------------------------------------------------------------------------------------------------------------------------------------------------------------------------------------------------------------------------------------------------------------------------------------------------------------------------------------------------------------------------------------------------------------------------------------------------------------------------------------------------------------------------------------------------------------------------------------------------------------------------------------------------------------------------------------------------------------------------------------------------------------------------------------------------------------------------------------------------------------------------------------------------------------------------------------------------------------------------------------------------------------------------------------------------------------------------------------------------------------------------------------------------------------------------------------------------------------------------------------------------------|
|                                       | <p>consumption OR purchas* OR dispos* OR storage OR storing OR sharing OR shared OR expect* OR request*)):ti,ab (313,796)</p> <p>37 ((inappropriat* OR irrational OR imprudent OR unnecessar* OR irresponsibl* OR misuse* OR improper* OR mistake* OR indiscriminat* OR suboptimum* OR bad OR overuse* OR excessiv* OR vary OR varied OR variation OR poor OR unsafe*) NEXT/4 (use* OR utili?e OR treatment OR consumption OR purchas* OR dispos* OR storage OR sharing OR shared OR expectation* OR request*)):ti,ab (91,427)</p> <p>38 ((appropriat* OR rational OR prudent OR judicious* OR optimal* OR correct OR proper* OR responsibl* OR safe* OR good OR decreas* OR limit* OR curb* OR minimi?e* OR minimal* OR lessen* OR curtail* OR abate* OR restrict* OR lower* OR discontinue* OR delay*) NEXT/4 (use* OR utili?e OR treatment OR consumption OR purchas* OR dispos OR storage OR sharing OR shared OR expectation* OR request*)):ti,ab (662,806)</p> <p>39 'drug seeking behavior'/mj (962)</p> <p>40 compliance:ti,ab OR concordance:ti,ab OR adherence:ti,ab (482,897)</p> <p>41 'medication compliance'/mj (11,595)</p> <p>42 'self-car*':ti,ab OR 'self-manag*':ti,ab OR 'self-monitor*':ti,ab OR 'self-medicat*':ti,ab (80,425)</p> <p>43 'self care'/mj (21.124)</p> <p>44 'self medication'/mj (4142)</p> <p>45 #25 OR #26 OR #27 OR #28 OR #29 OR #30 OR #31 OR #32 OR #33 OR #34 OR #35 OR #36 OR #37 OR #38 OR #39 OR #40 OR #41 OR #42 OR #43 OR #44 (6,315,153)</p> <p>46 #14 AND #23 AND #24 AND #45 (0)</p> |
| <b>Number of references found</b>     | 0                                                                                                                                                                                                                                                                                                                                                                                                                                                                                                                                                                                                                                                                                                                                                                                                                                                                                                                                                                                                                                                                                                                                                                                                                                                                                                                                                                                                                                                                                                                                         |
| <b>Electronic search report No. 3</b> |                                                                                                                                                                                                                                                                                                                                                                                                                                                                                                                                                                                                                                                                                                                                                                                                                                                                                                                                                                                                                                                                                                                                                                                                                                                                                                                                                                                                                                                                                                                                           |
| <b>Electronic database</b>            | Cochrane Central Register of Controlled Trials September 2021                                                                                                                                                                                                                                                                                                                                                                                                                                                                                                                                                                                                                                                                                                                                                                                                                                                                                                                                                                                                                                                                                                                                                                                                                                                                                                                                                                                                                                                                             |
| <b>Platform</b>                       | OVID                                                                                                                                                                                                                                                                                                                                                                                                                                                                                                                                                                                                                                                                                                                                                                                                                                                                                                                                                                                                                                                                                                                                                                                                                                                                                                                                                                                                                                                                                                                                      |
| <b>Date of search</b>                 | 27-04-2022                                                                                                                                                                                                                                                                                                                                                                                                                                                                                                                                                                                                                                                                                                                                                                                                                                                                                                                                                                                                                                                                                                                                                                                                                                                                                                                                                                                                                                                                                                                                |
| <b>Restriction of language</b>        | None                                                                                                                                                                                                                                                                                                                                                                                                                                                                                                                                                                                                                                                                                                                                                                                                                                                                                                                                                                                                                                                                                                                                                                                                                                                                                                                                                                                                                                                                                                                                      |
| <b>Other limits</b>                   | None                                                                                                                                                                                                                                                                                                                                                                                                                                                                                                                                                                                                                                                                                                                                                                                                                                                                                                                                                                                                                                                                                                                                                                                                                                                                                                                                                                                                                                                                                                                                      |
| <b>Search strategy (results)</b>      | <p>1 (superbug* or superinfection*).ti,ab. 438</p> <p>2 (multiresistan* or multi-resistan* or MDR or MDRO or AMR).ti,ab. 1404</p> <p>3 ((drug* or multidrug or multi-drug or antimicrobial* or anti-microbial* or antiinfection* or anti-infection* or antibacterial* or anti-bacterial* or antibiotic* or anti-biotic*) adj4 (resistan* or toleran*)):ti,ab. 10033</p> <p>4 Drug Resistance/ 1655</p> <p>5 Drug Resistance, Microbial/ 776</p> <p>6 Drug Resistance, Multiple/ 151</p> <p>7 Drug Tolerance/ 1976</p> <p>8 (r factor* or resistant factor*).ti,ab. 8</p>                                                                                                                                                                                                                                                                                                                                                                                                                                                                                                                                                                                                                                                                                                                                                                                                                                                                                                                                                                  |

|                                       |                                                                                                                                                                                                                                                                                                                                                                                                                                                                                                                                                                                                                                                                                                                                                                                                                                                                                                                                                                                                                                                                                                                                                                                                     |
|---------------------------------------|-----------------------------------------------------------------------------------------------------------------------------------------------------------------------------------------------------------------------------------------------------------------------------------------------------------------------------------------------------------------------------------------------------------------------------------------------------------------------------------------------------------------------------------------------------------------------------------------------------------------------------------------------------------------------------------------------------------------------------------------------------------------------------------------------------------------------------------------------------------------------------------------------------------------------------------------------------------------------------------------------------------------------------------------------------------------------------------------------------------------------------------------------------------------------------------------------------|
|                                       | <p>9 ((antimicrobial or anti-microbial or antiinfection or anti-infection or antibacterial or anti-bacterial or antibiotic or anti-biotic) adj4 stewardship).ti,ab. 443</p> <p>10 Anti-Infective Agents/ 2741</p> <p>11 Anti-Bacterial Agents/ 11411</p> <p>12 1 or 2 or 3 or 4 or 5 or 6 or 7 or 8 or 9 or 10 or 11 26330</p> <p>13 (public or population or community or citizen* or household* or resident* or consumer* or carer* or caregiver* or people or adult* or men or women or mother* or father* or parent* or student* or pupil* or children or adolescent* or teenager*).ti,ab. 676087</p> <p>14 Caregivers/ 2530</p> <p>15 Men/ 65</p> <p>16 women/ 251</p> <p>17 Parents/ 3642</p> <p>18 Fathers/ 219</p> <p>19 Mothers/ 2150</p> <p>20 Students/ 3293</p> <p>21 13 or 14 or 15 or 16 or 17 or 18 or 19 or 20 676626</p> <p>22 <b>(telegram or reddit).ti,ab. 104</b></p> <p>23 12 and 21 and 22 0</p>                                                                                                                                                                                                                                                                             |
| <b>Number of references found</b>     | 0                                                                                                                                                                                                                                                                                                                                                                                                                                                                                                                                                                                                                                                                                                                                                                                                                                                                                                                                                                                                                                                                                                                                                                                                   |
| <b>Electronic search report No. 4</b> |                                                                                                                                                                                                                                                                                                                                                                                                                                                                                                                                                                                                                                                                                                                                                                                                                                                                                                                                                                                                                                                                                                                                                                                                     |
| <b>Electronic database</b>            | CINAHL Complete                                                                                                                                                                                                                                                                                                                                                                                                                                                                                                                                                                                                                                                                                                                                                                                                                                                                                                                                                                                                                                                                                                                                                                                     |
| <b>Platform</b>                       | EBSCOhost                                                                                                                                                                                                                                                                                                                                                                                                                                                                                                                                                                                                                                                                                                                                                                                                                                                                                                                                                                                                                                                                                                                                                                                           |
| <b>Date of search</b>                 | 27-04-2022                                                                                                                                                                                                                                                                                                                                                                                                                                                                                                                                                                                                                                                                                                                                                                                                                                                                                                                                                                                                                                                                                                                                                                                          |
| <b>Restriction of language</b>        | None                                                                                                                                                                                                                                                                                                                                                                                                                                                                                                                                                                                                                                                                                                                                                                                                                                                                                                                                                                                                                                                                                                                                                                                                |
| <b>Other limits</b>                   | None                                                                                                                                                                                                                                                                                                                                                                                                                                                                                                                                                                                                                                                                                                                                                                                                                                                                                                                                                                                                                                                                                                                                                                                                |
| <b>Search strategy (results)</b>      | <p>S1 TX superbug* OR TX superinfection (3548)</p> <p>S2 MH Superinfection (229)</p> <p>S3 TX multiresistan* OR TX "multi-resistan*" OR AB MDR OR AB MDRO OR AB AMR (6226)</p> <p>S4 TX ((drug* OR multidrug OR "multi-drug" OR antimicrobial* OR "anti-microbial*" OR antiinfection* OR "anti-infection*" OR antibacterial* OR "anti-bacterial*" OR antibiotic* OR "anti-biotic*") N4 (resistant OR resistance OR tolerant OR tolerance)) (88,334)</p> <p>S5 MH "Drug Resistance" OR MH "Drug Resistance, Microbial" OR MH "Drug Resistance, Multiple" OR MH "Drug Tolerance" OR MH "antibiotic resistance" OR MH "multidrug resistance" (35,063)</p> <p>S6 TX "r factor*" OR TX "resistant factor*" (1251)</p> <p>S7 TX ((antimicrobial OR "anti-microbial" OR antiinfection OR "anti-infection" OR antibacterial OR "anti-bacterial" OR antibiotic OR "anti-biotic") N4 (stewardship)) (5958)</p> <p>S8 TX "Anti-Infective Agents" (441)</p> <p>S9 TX "Anti-Bacterial Agents" (160)</p> <p>S10 (S1 OR S2 OR S3 OR S4 OR S5 OR S6 OR S7 OR S8 OR S9) (96,099)</p> <p>S11 AB (public OR population OR community OR citizen* OR household* OR resident* OR consumer* OR carer* OR caregiver* OR</p> |

|  |                                                                                                                                                                                                                                                                                                                                                                                                                                                                                                                                                                                                                                                                                                                                                                                                                                                                                                                                                                                                                                                                                                                                                                                                                                                                                                                                                                                                                                                                                                                                                                                                                                                                                                                                                                                                                                                                                                                                                                                                                                                                                                                                                                                                                                                                                                                                                                                                                                                                                                                                                                                                                                                                                                                                                                                           |
|--|-------------------------------------------------------------------------------------------------------------------------------------------------------------------------------------------------------------------------------------------------------------------------------------------------------------------------------------------------------------------------------------------------------------------------------------------------------------------------------------------------------------------------------------------------------------------------------------------------------------------------------------------------------------------------------------------------------------------------------------------------------------------------------------------------------------------------------------------------------------------------------------------------------------------------------------------------------------------------------------------------------------------------------------------------------------------------------------------------------------------------------------------------------------------------------------------------------------------------------------------------------------------------------------------------------------------------------------------------------------------------------------------------------------------------------------------------------------------------------------------------------------------------------------------------------------------------------------------------------------------------------------------------------------------------------------------------------------------------------------------------------------------------------------------------------------------------------------------------------------------------------------------------------------------------------------------------------------------------------------------------------------------------------------------------------------------------------------------------------------------------------------------------------------------------------------------------------------------------------------------------------------------------------------------------------------------------------------------------------------------------------------------------------------------------------------------------------------------------------------------------------------------------------------------------------------------------------------------------------------------------------------------------------------------------------------------------------------------------------------------------------------------------------------------|
|  | <p>people OR adult* OR men OR women OR mother* OR father* OR parent* OR student* OR pupil* OR children OR adolescent* OR teenager*) (1,947,026)</p> <p>S12 MH Caregivers (40,170)</p> <p>S13 MH Men (6053)</p> <p>S14 MH Women (22,467)</p> <p>S15 MH Parents (48,949)</p> <p>S16 MH Fathers (7286)</p> <p>S17 MH Mothers (34,635)</p> <p>S18 MH Students (18,893)</p> <p>S19 (S11 OR S12 OR S13 OR S14 OR S15 OR S16 OR S17 OR S18) (2,003,527)</p> <p><b>S20 AB (telegram OR reddit) (234)</b></p> <p>S21 MH "Program Evaluation" (45,978)</p> <p>S22 TX ((behavior#r N3 (change* OR changing OR alter* OR modification* OR modify OR modifying OR modifies OR modified)) OR intention*) (215,472)</p> <p>S23 MH "Motivation" (44,027)</p> <p>S24 MH "Intention" (9259)</p> <p>S25 AB (attitude* OR belief* OR view* OR opinion* OR expectation* OR "anticipat* regret" OR knowledge OR awareness OR "health literacy" OR "risk perception*" OR "perceived risk*" OR "perceived susceptibility" OR "illness perception*" OR "treatment perception*") (529,234)</p> <p>S26 MH "Attitude to Health" (47,870)</p> <p>S27 TX "Health Knowledge, Attitudes, Practice" (243)</p> <p>S28 MH "Health Literacy" (5475)</p> <p>S30 AB ("perceived behavior#ral control" OR autonomy OR capacity OR "self-efficacy" OR competen* OR confidence OR ability OR skill*) (586,649)</p> <p>S31 TX "Self Efficacy" (62,806)</p> <p>S32 TX ("perceived norm*" OR "injunctive norm*" OR "subjective norm*" OR "descriptive norm*" OR "moral norm*" OR "self-identity") (10,673)</p> <p>S33 MH "Social Norms" (2318)</p> <p>S34 AB ((medication* OR drug* OR antimicrobial* OR "anti-microbial*" OR antiinfection* OR "anti-infection*" OR antibacterial* OR "anti-bacterial*" OR antibiotic* OR "anti-biotic*") N4 (use OR used OR usage OR consumption OR purchas* OR dispos* OR storage OR storing OR sharing OR shared OR expect* OR request*)) (92,257)</p> <p>S35 AB ((inappropriat* OR irrational OR imprudent OR unnecessar* OR irresponsibl* OR misuse* OR improper* OR mistake* OR indiscriminat* OR suboptimum* OR bad OR overuse* OR excessiv* OR vary OR varied OR variation OR poor OR unsafe*) N4 (use OR usage OR utili?e OR treatment OR consumption OR purchas* OR dispos* OR storage OR sharing OR shared OR expectation* OR request*)) (31,910)</p> <p>S36 AB ((appropriat* OR rational OR prudent OR judicious* OR optimal* OR correct OR proper* OR responsibl* OR safe* OR good OR decreas* OR limit* OR curb* OR minimi?e* OR minimal* OR lessen* OR curtail* OR abate* OR restrict* OR lower* OR discontinue* OR delay*) N4 (use OR usage OR utili?e OR treatment OR consumption OR purchas* OR dispos OR storage OR sharing OR shared OR expectation* OR request*)) (168,794)</p> |
|--|-------------------------------------------------------------------------------------------------------------------------------------------------------------------------------------------------------------------------------------------------------------------------------------------------------------------------------------------------------------------------------------------------------------------------------------------------------------------------------------------------------------------------------------------------------------------------------------------------------------------------------------------------------------------------------------------------------------------------------------------------------------------------------------------------------------------------------------------------------------------------------------------------------------------------------------------------------------------------------------------------------------------------------------------------------------------------------------------------------------------------------------------------------------------------------------------------------------------------------------------------------------------------------------------------------------------------------------------------------------------------------------------------------------------------------------------------------------------------------------------------------------------------------------------------------------------------------------------------------------------------------------------------------------------------------------------------------------------------------------------------------------------------------------------------------------------------------------------------------------------------------------------------------------------------------------------------------------------------------------------------------------------------------------------------------------------------------------------------------------------------------------------------------------------------------------------------------------------------------------------------------------------------------------------------------------------------------------------------------------------------------------------------------------------------------------------------------------------------------------------------------------------------------------------------------------------------------------------------------------------------------------------------------------------------------------------------------------------------------------------------------------------------------------------|

|                                       |                                                                                                                                                                                                                                                                                                                                                                                                                                                                                                                                                                                                                                                                                                                                                                                                                                                                                                                                                                                                                                                                                                                                                                                                                                                                                                                                                                                                                                                                                                                                                                        |
|---------------------------------------|------------------------------------------------------------------------------------------------------------------------------------------------------------------------------------------------------------------------------------------------------------------------------------------------------------------------------------------------------------------------------------------------------------------------------------------------------------------------------------------------------------------------------------------------------------------------------------------------------------------------------------------------------------------------------------------------------------------------------------------------------------------------------------------------------------------------------------------------------------------------------------------------------------------------------------------------------------------------------------------------------------------------------------------------------------------------------------------------------------------------------------------------------------------------------------------------------------------------------------------------------------------------------------------------------------------------------------------------------------------------------------------------------------------------------------------------------------------------------------------------------------------------------------------------------------------------|
|                                       | S37 MH "Drug-Seeking Behavior" (64)<br>S38 TX (compliance OR concordance OR adherence) (367,950)<br>S39 TX "Medication Adherence" (16,587)<br>S40 TX ("self-car*" OR "self-manag*" OR "self-monitor*" OR "self-medical*") (142,003)<br>S41 MH "Self Care" (43,627)<br>S42 MH "Self Medication" (2111)<br>S43 (S21 OR S22 OR S23 OR S24 OR S25 OR S26 OR S27 OR S28 OR S29 OR S30 OR S31 OR S32 OR S33 OR S34 OR S35 OR S36 OR S37 OR S38 OR S39 OR S40 OR S41) (1,735,029)<br>S44 S10 AND S19 AND S20 AND S42 (0)                                                                                                                                                                                                                                                                                                                                                                                                                                                                                                                                                                                                                                                                                                                                                                                                                                                                                                                                                                                                                                                      |
| <b>Number of references found</b>     | 0                                                                                                                                                                                                                                                                                                                                                                                                                                                                                                                                                                                                                                                                                                                                                                                                                                                                                                                                                                                                                                                                                                                                                                                                                                                                                                                                                                                                                                                                                                                                                                      |
| <b>Electronic search report No. 5</b> |                                                                                                                                                                                                                                                                                                                                                                                                                                                                                                                                                                                                                                                                                                                                                                                                                                                                                                                                                                                                                                                                                                                                                                                                                                                                                                                                                                                                                                                                                                                                                                        |
| <b>Electronic database</b>            | APA PsycInfo <1806 to October Week 3 2021>                                                                                                                                                                                                                                                                                                                                                                                                                                                                                                                                                                                                                                                                                                                                                                                                                                                                                                                                                                                                                                                                                                                                                                                                                                                                                                                                                                                                                                                                                                                             |
| <b>Platform</b>                       | OVID                                                                                                                                                                                                                                                                                                                                                                                                                                                                                                                                                                                                                                                                                                                                                                                                                                                                                                                                                                                                                                                                                                                                                                                                                                                                                                                                                                                                                                                                                                                                                                   |
| <b>Date of search</b>                 | 27-04-2022                                                                                                                                                                                                                                                                                                                                                                                                                                                                                                                                                                                                                                                                                                                                                                                                                                                                                                                                                                                                                                                                                                                                                                                                                                                                                                                                                                                                                                                                                                                                                             |
| <b>Restriction of language</b>        | None                                                                                                                                                                                                                                                                                                                                                                                                                                                                                                                                                                                                                                                                                                                                                                                                                                                                                                                                                                                                                                                                                                                                                                                                                                                                                                                                                                                                                                                                                                                                                                   |
| <b>Other limits</b>                   | None                                                                                                                                                                                                                                                                                                                                                                                                                                                                                                                                                                                                                                                                                                                                                                                                                                                                                                                                                                                                                                                                                                                                                                                                                                                                                                                                                                                                                                                                                                                                                                   |
| <b>Search strategy (results)</b>      | 1 (superbug* or superinfection*).ti,ab. 42<br>2 (multiresistant or multiresistance or "multi-resistant" or "multi-resistance" or MDR or MDRO or AMR).ti,ab. 405<br>3 ((drug* or multidrug or "multi-drug" or antimicrobial* or "anti-microbial*" or antiinfection* or "anti-infection*" or antibacterial* or "anti-bacterial*" or antibiotic* or "anti-biotic*") adj4 (resistant or resistance or tolerant or tolerance)).ti,ab. 4217<br>4 Drug Resistance.mh. 1990<br>5 Superinfection.mh. 9<br>6 "Drug Resistance, Multiple+".mh. 53<br>7 "Drug Resistance, Microbial+".mh. 61<br>8 Drug Tolerance.mh. 3554<br>9 ("r factor*" or "resistant factor*").ti,ab. 384<br>10 R Factors.mh. 2<br>11 ((antimicrobial or "anti-microbial" or antiinfection or "anti-infection" or antibacterial or "anti-bacterial" or antibiotic or "anti-biotic") adj4 stewardship).ti,ab. 86<br>12 Anti-Infective Agents.mh. 274<br>13 Anti-Bacterial Agents.mh. 1177<br>14 1 or 2 or 3 or 4 or 5 or 6 or 7 or 8 or 9 or 10 or 11 or 12 or 13 11308<br>15 (public or population or community or citizen* or household* or resident* or consumer* or carer* or caregiver* or people or adult* or men or women or mother* or father* or parent* or student* or pupil* or children or adolescent* or teenager*).ti,ab. 2531377<br>16 Caregivers.mh. 15137<br>17 Men.mh. 955<br>18 Women.mh. 3351<br>19 Parents.mh. 20783<br>20 Fathers.mh. 2733<br>21 Mothers.mh. 12531<br>22 Students.mh. 24851<br>23 15 or 16 or 17 or 18 or 19 or 20 or 21 or 22 2536114<br>24 intervention*.ti,ab. 432065 |

|    |                                                                                                                                                                                                                                                                                                                                                                                                                                                                                                                                                   |
|----|---------------------------------------------------------------------------------------------------------------------------------------------------------------------------------------------------------------------------------------------------------------------------------------------------------------------------------------------------------------------------------------------------------------------------------------------------------------------------------------------------------------------------------------------------|
| 25 | (training or teaching or education or program* or initiative* or workshop* or seminar* or module* or session* or curriculum).ti,ab. 1078481                                                                                                                                                                                                                                                                                                                                                                                                       |
| 26 | Teaching.mh. 8653                                                                                                                                                                                                                                                                                                                                                                                                                                                                                                                                 |
| 27 | Teaching Materials.mh. 663                                                                                                                                                                                                                                                                                                                                                                                                                                                                                                                        |
| 28 | Education.mh. 3859                                                                                                                                                                                                                                                                                                                                                                                                                                                                                                                                |
| 29 | Models, Educational.mh. 1756                                                                                                                                                                                                                                                                                                                                                                                                                                                                                                                      |
| 30 | Health Education.mh. 9356                                                                                                                                                                                                                                                                                                                                                                                                                                                                                                                         |
| 31 | Education, Nonprofessional.mh. 286                                                                                                                                                                                                                                                                                                                                                                                                                                                                                                                |
| 32 | Curriculum.mh. 9229                                                                                                                                                                                                                                                                                                                                                                                                                                                                                                                               |
| 33 | ((written or printed or online or oral or disseminat* or provi*) adj2 (information or advice or resource* or material*)).ti,ab. 66515                                                                                                                                                                                                                                                                                                                                                                                                             |
| 34 | (pamphlet* or handout* or poster* or leaflet* or newsletter* or brochure* or booklet* or TV or television or radio or marketing or adverti?ing or publicity or campaign* or "mass media" or "communication media" or outreach or computer* or Internet or online or website* or "social media" or "social network*" or Facebook or Twitter or tweet or blog* or SMS or "short messaging service*" or text* or email* or podcast* or smartphone* or ((mobile or cell or smart) adj1 (phone* or telephone* or app* or application*))).ti,ab. 482949 |
| 35 | Consumer Health Information.mh. 901                                                                                                                                                                                                                                                                                                                                                                                                                                                                                                               |
| 36 | Health Promotion.mh. 14597                                                                                                                                                                                                                                                                                                                                                                                                                                                                                                                        |
| 37 | Health Communication.mh. 794                                                                                                                                                                                                                                                                                                                                                                                                                                                                                                                      |
| 38 | Persuasive Communication.mh. 1524                                                                                                                                                                                                                                                                                                                                                                                                                                                                                                                 |
| 39 | Public Health.mh. 4897                                                                                                                                                                                                                                                                                                                                                                                                                                                                                                                            |
| 40 | Audio Visual Aids.mh. 0                                                                                                                                                                                                                                                                                                                                                                                                                                                                                                                           |
| 41 | Manuals as Topic.mh. 1129                                                                                                                                                                                                                                                                                                                                                                                                                                                                                                                         |
| 42 | Pamphlets.mh. 640                                                                                                                                                                                                                                                                                                                                                                                                                                                                                                                                 |
| 43 | Advertising as Topic.mh. 1922                                                                                                                                                                                                                                                                                                                                                                                                                                                                                                                     |
| 44 | Marketing.mh. 937                                                                                                                                                                                                                                                                                                                                                                                                                                                                                                                                 |
| 45 | Social Marketing.mh. 875                                                                                                                                                                                                                                                                                                                                                                                                                                                                                                                          |
| 46 | Mass Media.mh. 2388                                                                                                                                                                                                                                                                                                                                                                                                                                                                                                                               |
| 47 | Social Networking.mh. 1175                                                                                                                                                                                                                                                                                                                                                                                                                                                                                                                        |
| 48 | Social Media.mh. 1851                                                                                                                                                                                                                                                                                                                                                                                                                                                                                                                             |
| 49 | (digital marketing or LinkedIn or Instagram or Pinterest or TikTok).ti,ab. 1520                                                                                                                                                                                                                                                                                                                                                                                                                                                                   |
| 50 | 24 or 25 or 26 or 27 or 28 or 29 or 30 or 31 or 32 or 33 or 34 or 35 or 36 or 37 or 38 or 39 or 40 or 41 or 42 or 43 or 44 or 45 or 46 or 47 or 48 or 49 1695593                                                                                                                                                                                                                                                                                                                                                                                  |
| 51 | Program Evaluation.mh. 13211                                                                                                                                                                                                                                                                                                                                                                                                                                                                                                                      |
| 52 | ((behavio#r adj3 (change* or changing or alter* or modification* or modify or modifying or modifies or modified)) or intention*).ti,ab. 90690                                                                                                                                                                                                                                                                                                                                                                                                     |
| 53 | Motivation.mh. 29614                                                                                                                                                                                                                                                                                                                                                                                                                                                                                                                              |
| 54 | Intention.mh. 5740                                                                                                                                                                                                                                                                                                                                                                                                                                                                                                                                |
| 55 | (attitude* or belief* or view* or opinion* or expectation* or "anticipat* regret" or knowledge or awareness or "health literacy" or "risk perception*" or "perceived risk*" or "perceived susceptibility" or "illness perception*" or "treatment perception*").ti,ab. 1045231                                                                                                                                                                                                                                                                     |
| 56 | Attitude to Health.mh. 25349                                                                                                                                                                                                                                                                                                                                                                                                                                                                                                                      |
| 57 | Health Knowledge, Attitudes, Practice.mh. 27538                                                                                                                                                                                                                                                                                                                                                                                                                                                                                                   |
| 58 | Health Literacy.mh. 1639                                                                                                                                                                                                                                                                                                                                                                                                                                                                                                                          |
| 59 | ("perceived behavio#ral control" or autonomy or capacity or "self-efficacy" or competen* or confidence or ability or skill*).ti,ab. 732847                                                                                                                                                                                                                                                                                                                                                                                                        |
| 60 | Self Efficacy.mh. 9898                                                                                                                                                                                                                                                                                                                                                                                                                                                                                                                            |
| 61 | ("perceived norm*" or "injunctive norm*" or "subjective norm*" or "descriptive norm*" or "moral norm*" or "self-identity").ti,ab. 9151                                                                                                                                                                                                                                                                                                                                                                                                            |
| 62 | Social Norms.mh. 517                                                                                                                                                                                                                                                                                                                                                                                                                                                                                                                              |



|                                   |                                                                                                                                                                                                                                                                                                                                                                                                                                                                                                                                                                                                                                                                                                                                                                                                                                                                                                                                                                                                                                                                                                                                                                                                                                                                                                                                                                                                                                                                                                                                                                                                                                                                                                                                                                                 |
|-----------------------------------|---------------------------------------------------------------------------------------------------------------------------------------------------------------------------------------------------------------------------------------------------------------------------------------------------------------------------------------------------------------------------------------------------------------------------------------------------------------------------------------------------------------------------------------------------------------------------------------------------------------------------------------------------------------------------------------------------------------------------------------------------------------------------------------------------------------------------------------------------------------------------------------------------------------------------------------------------------------------------------------------------------------------------------------------------------------------------------------------------------------------------------------------------------------------------------------------------------------------------------------------------------------------------------------------------------------------------------------------------------------------------------------------------------------------------------------------------------------------------------------------------------------------------------------------------------------------------------------------------------------------------------------------------------------------------------------------------------------------------------------------------------------------------------|
|                                   | <p>63 ((medication* or drug* or antimicrobial* or "anti-microbial*" or antiinfection* or "anti-infection*" or antibacterial* or "anti-bacterial*" or antibiotic* or "anti-biotic*") adj4 ("use" or used or usage or consumption or purchas* or dispos* or storage or storing or sharing or shared or expect* or request*)).ti,ab. 71349</p> <p>64 ((inappropriat* or irrational or imprudent or unnecessar* or irresponsibl* or misuse* or improper* or mistake* or indiscriminat* or suboptimum* or bad or overuse* or excessiv* or vary or varied or variation or poor or unsafe*) adj4 ("use" or usage or utili?e or treatment or consumption or purchas* or dispos* or storage or sharing or shared or expectation* or request*)).ti,ab. 20962</p> <p>65 ((appropriat* or rational or prudent or judicious* or optimal* or correct or proper* or responsibl* or safe* or good or decreas* or limit* or curb* or minimi?e* or minimal* or lessen* or curtail* or abate* or restrict* or lower* or discontinue* or delay*) adj4 ("use" or usage or utili?e or treatment or consumption or purchas* or dispos or storage or sharing or shared or expectation* or request*)).ti,ab.86321</p> <p>66 Drug-Seeking Behavior.mh. 649</p> <p>67 (compliance or concordance or adherence).ti,ab. 62862</p> <p>68 Medication Adherence.mh. 3851</p> <p>69 ("self-car*" or "self-manag*" or "self-monitor*" or "self-medicat*").ti,ab. 29178</p> <p>70 Self Care.mh. 7562</p> <p>71 Self Medication.mh. 851</p> <p>72 51 or 52 or 53 or 54 or 55 or 56 or 57 or 58 or 59 or 60 or 61 or 62 or 63 or 64 or 65 or 66 or 67 or 68 or 69 or 70 or 71 1817670</p> <p>73 14 and 23 and 50 and 72 714</p> <p>74 <b>(Reddit or Telegram).ti,ab. 279</b></p> <p>75 14 and 23 and 72 and 74 1</p> |
| <b>Number of references found</b> | 1                                                                                                                                                                                                                                                                                                                                                                                                                                                                                                                                                                                                                                                                                                                                                                                                                                                                                                                                                                                                                                                                                                                                                                                                                                                                                                                                                                                                                                                                                                                                                                                                                                                                                                                                                                               |

This one paper found was a dissertation which did not meet our study eligibility criteria.
