# Supplementary material for: Public Health Interventions to Improve Antimicrobial Resistance Awareness and Behavioural Change Associated with Antimicrobial Use: A Systematic Review Exploring the Use of Social Media
Source: Antibiotics (Basel). 2022 May 16;11(5):669. doi: 10.3390/antibiotics11050669 (PMC9137793; doi:10.3390/antibiotics11050669)
Supplement: Supplementary file 1 [file antibiotics-11-00669-s001.zip]

Archive with 5 entries (5 files):
- File S1 - Electronic search report..pdf
- File S2 - Data extration.xlsx
- File S3 - List of studies excluded.pdf
- File S4- Risk of bias.xlsx
- File S5 - Revised Search Strategy.pdf
