# Supplementary material for: Public Health Interventions to Improve Antimicrobial Resistance Awareness and Behavioural Change Associated with Antimicrobial Use: A Systematic Review Exploring the Use of Social Media
Source: Antibiotics (Basel). 2022 May 16;11(5):669. doi: 10.3390/antibiotics11050669 (PMC9137793; doi:10.3390/antibiotics11050669)
Supplement: Supplementary file 1 [file antibiotics-11-00669-s001.zip › File S2 - Data extration.xlsx]

## Sheet: Studies
ID	Title	Year	Extractor	Reviewer
6	The drugs don't work: evaluation of educational theatre to gauge and influence public opinion on antimicrobial resistance.	2020	Doaa	Nathaly
8	Peer-education as a tool to educate on antibiotics, resistance and use in 16 to18-year-olds: A feasibility study	2020	Sana	Akke
9	The effects of gamification on antimicrobial resistance knowledge and its relationship to dentistry in Saudi Arabia: a randomized controlled trial	2020	Sana	Akke
10	Development and randomized controlled trial of an animated film aimed at reducing behaviours for acquiring antibiotics	2021	Nathaly	Sana
13	Reducing expectations for antibiotics in primary care: a randomised experiment to test the response to fear-based messages about antimicrobial resistance.	2020	Akke	Nathaly
15	The Mould that Changed the World': quantitative and qualitative evaluation of children's knowledge and motivation for behavioural change following participation in an antimicrobial resistance musical	2020	Doaa	Sana
16	Changing Patient and Public Beliefs About Antimicrobials and Antimicrobial Resistance (AMR) Using a Brief Digital Intervention	2021	Sana	Nathaly
21	Aston University's Antimicrobial Resistance (AMR) Roadshow: raising awareness and embedding knowledge of AMR in key stage 4 learners	2020	Nathaly	Doaa
22	Effect of Didactic Educational Intervention on Improving Knowledge of Antibiotics Use and Resistance in Yogyakarta Community	2021	Doaa	Nathaly
25	Impact of community-based educational intervention on antibiotic use and resistance awareness among the people living in Ras Al Khaimah, United Arab Emirates	2020	Sana	Akke
27	The effect of public health educational campaign regarding antibiotic use and microbial resistance on knowledge, attitude, and practice in the Iran.	2021	Nathaly	Sana
29	Using debate to educate young people in schools about antibiotic use and resistance: A before and after evaluation using a questionnaire survey.	2019	Sana	Doaa
30	The Consequences of AMR Education and Awareness Raising: Outputs, Outcomes, and Behavioural Impacts of an Antibiotic-Related Educational Activity in Lao PDR.	2018	Akke	Nathaly
31	Educational intervention to enhance adherence to short-term use of antibiotics.	2019	Nathaly	Akke
33	Can Gaming Increase Antibiotic Awareness in Children? A Mixed-Methods Approach	2017	Sana	Nathaly
34	A mixed-method evotuotion of peer-education workshops for school- aged children to teach about ontibiotics, microbes and hygiene	2017	Sana	Doaa
35	A literacy-sensitive approach to improving antibiotic understanding in a community-based setting	2017	Sana	Doaa

## Sheet: Characteristic
Study ID	Author	title	year	Design of study	Aim of study	Country	Population	Total no. randomised (or total pop. at start of study for NRCTs)	Clusters (if applicable, no., type, no. people per cluster)	Note:	Sample size (including power calculation & statistical analysis)	Recruitment methods	Start and end date	Total study duration	Intervention name	No. randomised to group (specify whether no. people or clusters)	Description (include sufficient detail for replication, e.g. content, dose, components)	It used of social media in public health interventions	The messaging used in these public health interventions	Duration of intervention	Duration of follow-up	Theoretical framework employed in intervention design	Comparator/ control name	No. randomised to group (specify whether no. people or clusters)	Description (include sufficient detail for replication, e.g. content, dose, components)	It used of social media in public health interventions	The messaging used in these control intervention	Outcomes name	Definition of outcomes	Unit of measurement (if relevant)	Scales: upper and lower limits (indicate whether high or low score is good)	Is outcome/tool validated?	Imputation of missing data (e.g. assumptions made for ITT analysis)	How was the outcome measure collected? Telephone survey, mail survey, in person by trained assessor, routinely collected data, other	Result (excel sheet where the result is found: DO or CO)	Sources of funding	Key conclusions of the study authors
8	McNulty, Cliodna A M and Syeda, Rowshonara B and Brown, Carla L and Bennett, C Verity and Schofield, Behnaz and Allison, David G and Verlander, Neville Q and Francis, Nick	Peer-education as a tool to educate on antibiotics, resistance and use in 16 to18-year-olds: A feasibility study	2020	randomised controlled	Determine the feasibility of university, school and student recruitement, consent procdures, pre post and follow up questionnaire completion	UK	two universities, 17 secondary schools.	7 schools, with 160+95+21+25 students	Schools in two areas (Manchester and Cardiff)	Only including secondary school students	convenience samples, in each are two intervention schools delivering to 100 students. Attrition expected to be 75%	approach schools to participated (through university)		3 months	e-bug	181	student education	sms reporting of ab prescribing	knowledge	once off	3 months	peer education	no education	120 (75 attended lesson)				correctly answered quesitons (max 16?)		N	0-16	yes	no	in class		ECDC	knowledge scores were higher after intervention
																												antibiotic usage in three months after		N	0-?	no	no	sms
9	Aboalshamat K Halwani R, Bitan A, Alansari R, Khayat A and Aboalshamat, Khalid and Khayat, Amjad and Halwani, Ragheb and Bitan, Ammar and Alansari, Ryyan	The effects of gamification on antimicrobial resistance knowledge and its relationship to dentistry in Saudi Arabia: a randomized controlled trial	2020	single blind parallel group RCT	is gamificaiton better to improve knowledge compared to conventional lecture	Saudi Arabia	female volunteers from a society	112 (93 participants)		AMR in relation to dentistry	47 (I) + 46 ©	convenience		1 month	Chancellor board game	93	game versusu lecture, board game to be played in gorup	no		once off	one month		conventional lecture	94	game played in gorup or lecture	no		knowledge score	10 questions, agree or do not agree or do not know, agree is a point	n	0-26	no	no	questionnaire		self funded	gamification imporves knowledge and has better retention than conventional lecture
10	Wilding S Thompson W, Howard P, Jeuken LJC, Pownall M, Conner M, Sandoe JAT, Kettu V and Wilding, Sarah and Kettu, Virpi and Thompson, Wendy and Howard, Philip and Jeuken, Lars J C and Pownall, Madeleine and Conner, Mark and Sandoe, Jonathan A T	Development and randomized controlled trial of an animated film aimed at reducing behaviours for acquiring antibiotics	2021	Randomized controlled trial	To assess the impact of the animation on beliefs compared with control	UK	Eligible participants were those over 18 currently residing in the UK.	479 participants	Not applicable		Not reported, Supplementary data, page 15 checklist in Sample size was reported NA.	A sample of UK adults was recruited via Prolific (https://prolific.ac/), an online study recruitment website where participants are paid for taking part in research.	Participants were recruited on 31 May 2019 for the Time 1 survey and 12 July 2019 for the Time 2 survey	6 weeks	Antibiotic animated film	211	Supplementary data: Figure S1. Steps of methodology for intervention development and evaluation. page 6, Figure S2: Key factors used to assess target behaviour: Potential impact: Relevance to National Health Service (NHS) primary care in the UK, Potential for modification in practical terms, Positive impact on other related behaviours, Measurable Target behaviour: Adult patients asking for antibi…	The final intervention comprised, a short (51 second) stop-motion plasticine-based animated film available at https://www.youtube.com/watch?v"r_50QNX0-t0 This was produced in the style of well-known animated characters such as Wallace and Gromit, in an effort to make it entertaining and engaging.	Supplementary data: page 7, Figure S3 Image from animation: Although imagery intended to evoke fear of AMR was incorporated positive messages about the benefits of avoiding antibiotics were also included. Page 4: Box. Final animation transcript "Some bacteria cause infections, but not all bacteria are bad. We all have many helpful bacteria living inside us. These helpful bacteria help us fight in…	Short film: 50 seconds	Participants were asked to complete the same questionnaire immediately after watching the film (Time 1) and 6weeks later (Time 2)	Supplementary data: Table S1. Principles for the animation intervention Figure S1. Steps of methodology for intervention development and evaluation. Principles were developed for the animation and intervention components identified in stage 1. Stage 1: Understanding the behaviour Stage 2: Intervention (animation) planning and production Stage 3: Evaluation of the impact of the animation on knowle…	control video	206	A short animated film whose content related to using of proportional representation in Canada (control). The control video was selected as it had been created by the same animator, it was also of a similar duration, and communicated information on a topic of similar complexity.	It is not clear. We suppose they shared it on YouTube same the intervention video, however, they did not show the link in the article.	Not reported	General reactions to the film	Using three items (‘I found the video interesting’; ‘I found the video informative’; ‘I found the video entertaining’)		All questions used the same response item scoring a five-point Likert type scale (strongly disagree to strongly agree, scored 1 to 5) and therefore the low scores demonstrate low levels of intention/cognitions relating to antibiotic use behaviour	It is not clear	Participants also completed the questionnaire at Time 2 and their data could be matched across timepoints.	Participants were e-mailed a link to the online questionnaire	Page 5 and 7 of pdf	This work was supported by the British Society for Antimicrobial Chemotherapy and the ‘Antimicrobial Resistance Cross Council Initiative (Grant number MR/N029976/1), Funding Partners: The Biotechnology and Biological Sciences Research Council, the Engineering and Physical Sciences Research Council, and the Medical Research Council	* Some patients continue to ask their doctor or dentist for antibiotics. * The animated film developed and tested here showed potential as an intervention to discourage patients from asking for antibiotics. * It produced a sustained increase in knowledge but impacts on intentions not to ask for antibiotics had waned at 6 weeks. * Evaluation in the clinical environment will be needed to see if the…
																												Knowledge of antibiotics	using 10 items, separated into three key messages Message 1 focused on the idea that we have ‘helpful bacteria’ that are important for health Message 2 focused on the idea that antibiotics kill our ‘helpful bacteria’ and that this allows resistant bacteria to multiply Message 3 focused on the idea that taking antibiotics when you don’t need them can harm your health			It is not clear			see CO
																												Attitudes towards aspects of antibiotic use	using eight items			It is not clear			see CO
13	Roope LSJ Herd N, Michie S, Pouwels KB, Castro-Sanchez E, Sallis A, Hopkins S, Robotham JV, Crook DW, Peto T, Peters M, Butler CC, Walker AS, Wordsworth S, Tonkin-Crine S and Roope, Laurence S J and Tonkin-Crine, Sarah and Herd, Natalie and Michie, Susan and Pouwels, Koen B and Castro-Sanchez, Enrique and Sallis, Anna and Hopkins, Susan and Robotham, Julie V and Crook, Derrick W and Peto, Tim and…	Reducing expectations for antibiotics in primary care: a randomised experiment to test the response to fear-based messages about antimicrobial resistance.	2020	Randomised experiment	To evaluate if fear based messages with empowering inforamtion are more effective than fear based alone	UK	Adult members of the UK general public	4000		Three groups (waves), receiving strong fear, mild fear with or wihtout empowering information Wave 2 was conducted as a validation study, using identical methods but analysed separately on an independent sample, after analysing data from wave 1.	4000	online panel, two waves (as part of large general public UK survey)	Oct/Nov 2016 and March 2017	17 days and 20 days	respondent panels	2*4000	Fear message only, 100, mild fear+empowerment: 1500, strong fear +empowerment 1500	none	fear based, empowerment	as part of survey	no FU	health psychology theory on empowering	wave 1: ‘Fear’ message only	1000	Aa ‘fear message’ about the dangers of AMR, and AMR being caused by inappropriate antibiotic use.	No	‘Antibiotic resistance happens when an antibiotic no longer kills or controls growing bacteria. It is an increasingly serious threat to public health. Without antibiotics that work well, many routine treatments will become increasingly dangerous. Setting broken bones, and even basic operations, rely on access to antibiotics that work. Antibiotic resistance is believed to be caused by unnecessary …	likelyhood to visit doctor	less likely/more likely	% in each group		no	no	online survey		NIHR	fear could be effective in public campagnes to reduce inappropriate AB use, but should be combined with empowering messaging.
																												request antibiotic	less likely/more likely	% in each group		no	no	online survey
																												AB helped ILI (influenze like illlness)	will help	% in each group		no	no	online survey
30	Haenssgen, Marco J and Xayavong, Thipphaphone and Charoenboon, Nutcha and Warapikuptanun, Penporn and Khine Zaw, Yuzana	The Consequences of AMR Education and Awareness Raising: Outputs, Outcomes, and Behavioural Impacts of an Antibiotic-Related Educational Activity in Lao PDR.	2018	Educational activity assessed through census survey data	inform the awareness agenda from a social sciences perspective by assessing the outputs, outcomes, and behavioural impacts of an ABR-themed educational activity in the low-income setting	Laos	two villages	1130			1130	panel survey			6*half a day interactive sessions for 25-40 people		share information and ideas about antibiotics and drug resistance in line with messages from the World Health Organization																	survey			Among participants, the educational activity influenced the awareness and understanding of “drug resistance”, whereas the effects on attitudes were minor. The evidence on the behavioural impacts was sparse and mixed, but the range of possible consequences included a disproportionate uptake of antibiotics from formal healthcare providers. Our study casts doubt on the continued dominance of awarene…
31	West, Lorna Marie and Cordina, Maria and West LM, Cordina M and West, Lorna Marie and Cordina, Maria	Educational intervention to enhance adherence to short-term use of antibiotics.	2019	Randomized controlled trial	to assess whether an intervention by community pharmacists supported by an educational leaflet enhances adherence and reduces cost in relation to wastage of unused antibiotics amongst patients taking shortterm antibiotics at community level and to determine a possible association between adherence to short-term antibiotic use and patients' general beliefs about medicines.	Malta	Patients aged 18 years and older of any gender presenting at one of 14 community pharmacies with a prescription for oral solid dosage form short-term antibiotics	400	Two pharmacies from every one of the six regions of Malta and Gozo were chosen randomly to act as sampling sites, with the aim of including patients from all the different geographical regions of Malta.	Each pharmacy was asked to recruit a maximum of 70 patients each until the study sample size (400 patients) was reached (200 patients from each group). Pharmacists from both the intervention group and control group were asked to invite consecutive patients who presented at their pharmacy with an antibiotic prescription to participate in the study. Pharmacists working within each pharmacy screened…	A sample size of 384 responses was required to give 95% confidence interval with a 5% margin of error	First a pharmacy from each region of Malta and Gozo were randomly selected to form part of the intervention group; then a pharmacy from each region of Malta and Gozo were randomly selected to form part of the control group. Therefore, in total, seven from the fourteen selected pharmacies were asked to use the leaflet to counsel patients (interventiongroup), whilst the other seven pharmacies acted…	December 2016 and February 2017	3 months	Educational leaflet	200	If patients consented to participate, the pharmacists within the intervention group were asked by the research team to fill the instructions on the top section of the leaflet, provide oral counselling based on information from the leaflet, and hand the leaflet to the patient together with their antibiotic package and other counselling they deemed necessary in relation to the specific antibiotic b…	No	The panel providing face and content validity agreed with the information provided in the leaflet but requested the following points: 1) to include information using non-technical language in relation to the major problem of antibiotic resistance in Malta with serious untreatable infections in some patients as a consequence, 2) to specify the exact timing of antibiotic administration on leaflets …	3 months	The day following the stipulated termination date of antibiotic course, all patients were contacted by phone by the principal researcher until the sample size was reached.	Thematic analysis for the two focus groups was carried out using the framework method.	Control group	200	Pharmacists within the control group provided counselling as usual.	No	It is not clear	Adherence to antibiotics	Adherence was measured by asking the patients to count the amount of leftover antibiotic tablets/capsules from the current course, and if any were left, patients were considered as non-adherent and were asked the reasons for their leftover antibiotics.	-	-	It is not clear	If a patient did not answer the call, the principal researcher retried contacting the patient another two times and if by then the call was not answered, the patient was excluded. Pharmacists were informed to stop recruiting patients and were only asked to recruit new patients to make up for the ones that were excluded due to the fact these could not be reached by phone.	The following details were also gathered by all pharmacists (intervention and control): patient's name and contact number, name of antibiotic prescribed, dose and regimen, date when antibiotic was started and date of when it will be completed, ideal time to contact patient and time it took in minutes to advice patients. The day following the stipulated termination date of antibiotic course, all p…	See DO	The research work disclosed in this publication is partially funded by the REACH HIGH Scholars Programme – Post Doctoral Grants. The grant is part-financed by the European Union, Operational Programme II – Cohesion Policy 2014–2020 ‘Investing in human capital to create more opportunities and promote the well-being of society’ – European Social Fund.	An educational intervention has significantly supported adherence to prescribed short-term antibiotics and reduced wastage. Informing patients about antibiotic resistance when dispensing antibiotics can further increase adherence to antibiotic treatment. Taking into consideration patients' beliefs is also an important strategy to identify individuals who need further support with adherence to ant…
																												Reasons for patients not fully taking their antibiotics	Patients were also asked the name and amount of other leftover antibiotics at home from previous courses and the reasons for these unused antibiotics	-	-	It is not clear			See DO
																												Knowledge about antibiotic resistance	It is not clear	-	It is not clear	It is not clear			See DO

## Sheet: Dichotomous outcome (DO)
Study ID	Intervention name	Comparator/ control name	Outcome	Subgroups (if applicable)	nº baseline data of intervention group (if the study reports it)	Total participants of Intervention group (if the study reports it)	nº Events of Intervention group	Total participants of Intervention group	Proportion or percentage calculated (if the study reports it)	nº baseline data of control group (if the study reports it)	Total participants of control group (if the study reports it)	nº Events of control group	Total participants of control group	Proportion or percentage calculated (if the study reports it)	No. of missing participants and reasons	No. participants moved from other group and reasons	Any other results reported	Statistical methods used and appropriateness of these methods (e.g. adjustment for correlation	pg & fig/tabla	Note:

## Sheet: Continuous outcome (CO)
Study ID	Intervention name	Comparator/ control name	Outcome	Subgroups (if applicable)	Outcome Measure of baseline data (Mean, Median, %)	Measure of baseline data in Intervention group	measure dispersion (SD, range) (or other variance)	Measure of baseline data in control group	measure dispersion (SD, range) (or other variance)	Post-intervention or change from baseline?	Outcome Measure of result (Mean, Median, %)	Change of measure in Intervention group	measure dispersion (SD, range) (or other variance)	Total participants of Intervention group	Change of measure in control group	measure dispersion (SD, range) (or other variance)	Total participants of control group	No. of missing participants and reasons	No. participants moved from other group and reasons	Any other results reported	Statistical methods used and appropriateness of these methods (e.g. adjustment for correlation	pg & fig/tabla	Note:
8	e-bug	none	median score	Cardiff	median	11	9-13	6	4-8		median	14	12-15	89	13	12-14	8	5-12	18	7	4-10
				manchester	median	13	11-14	8	7-11		median	13	12-14	21	14	11-15			50	8	7-12
9	gamification/board game	conventional lecture	score (max 100)		mean	13.95	4.03	14.25	3.52		mean	21.6	3.15	46	19.78	3.32	20.3	3.61	47	16.17	3.40
13	Fear based messaging	none	‘more/much more likely’ to visit a doctor	Fear only	%	29.2														p < 0.0001	Wilcoxon’s single-sample sign-rank tests
				Midl fear+empowerment	%	45.1
				Strong fear+empowerment	%	46.1
			‘less/much less likely’ to visit a doctor	Fear only	%	14.1														p = 0.01	Wilcoxon’s single-sample sign-rank tests
				Midl fear+empowerment	%	10.3
				Strong fear+empowerment	%	11.3
			‘less/much less likely’ to ask for antibiotics	Fear only	%	42.3														p < 0.0001	Wilcoxon’s single-sample sign-rank tests
				Midl fear+empowerment	%	52.5
				Strong fear+empowerment	%	54.7
			‘more/much more likely’ to ask for antibiotics	Fear only	%	10.1														p = 0.08	Wilcoxon’s single-sample sign-rank tests
				Midl fear+empowerment	%	8.2
				Strong fear+empowerment	%	7.5
31	Educational leaflet	Control group	Beliefs about medicines	No
			General-Benefit beliefs	No	-	-	-	-	-	-	Mean	14.8	2.09	200	14.34	2.44	200	-	-	‘General-Benefit’ beliefs were statistically significantly higher for the intervention group when compared to the control group (p=0.044). Presence of chronic conditions was not significantly related to patients' beliefs in either group (p = > 0.05).	One-Way analysis of variance (ANOVA) was used to assess the differences between the intervention and control group.	Table 4, page 198	When performing logistic regression, there was no statistically significant association between adherence and BMQ-General covariates in the intervention group. In the control group, higher ‘General-Overuse’ beliefs were significantly associated with non-adherence OR 0.685 (0.584–0.803) (Table 5, page 198).
			General-Harm beliefs	No	-	-	-	-	-	-	Mean	11.05	2.12	200	10.74	2.44	200	-	-
			General-Overuse beliefs	No	-	-	-	-	-	-	Mean	11.88	2.69	200	11.97	2.79	200	-	-
30	Educational activity assessed through census survey data	none																				Table 6, Pg 12

## Sheet: CO of ID 10
Study ID	Intervention name	Comparator/ control name	Outcome	Subgroups (if applicable)	Outcome Measure of result (Mean, Median, %)	Measure in Intervention group	measure dispersion (SD, range) (or other variance)	Total participants of Intervention group	Measure in control group	measure dispersion (SD, range) (or other variance)	Total participants of control group	Measure in Intervention group	measure dispersion (SD, range) (or other variance)	Total participants of Intervention group	Measure in control group	measure dispersion (SD, range) (or other variance)	Total participants of control group	No. of missing participants and reasons	No. participants moved from other group and reasons	Any other results reported	Statistical methods used and appropriateness of these methods (e.g. adjustment for correlation	pg & fig/tabla	Note:
10	Antibiotic animated film	control video	Knowledge of antibiotics	No		Time 1						Time 2 (6 weeks)						62	No		Tests of differences between conditions They mentioned "Subsequent analyses used ANOVA to assess differences in knowledge, attitude/beliefs and intentions between the intervention and control conditions at Time 1 and at Time 2 (6week followup)" However, It is not clear why they used ANOVA and not t-test. Also, they did not mention any test of normality.	pg 6 Table 3	Results for each questionnaire item are shown in Figure S4 Results of items in the evaluation questionnaire. Supplementary data, page 8 In terms of the intended target behaviour, 87% of participants who had viewed the animated film stated they would not ask for antibiotics (agreed or strongly agreed with the Q12 intention item ‘I will not askmy doctor or dentist for antibiotics if I could do with…
			1. Some ‘good’ bacteria are important for health	No	Mean	4.75	0.4	211	4.48	0.56	206	4.65	0.49	211	4.61	0.47	206	62	No	***p<0.001 intervention vs control in time 1
			2. Antibiotics kill ‘good’ bacteria.	No	Mean	4.44	0.79	211	3.77	0.85	206	4.31	0.78	211	4.06	0.76	206	62	No	***p<0.001 intervention vs control in time 1 ***p<0.001 intervention vs control in time 2
			3. Taking antibiotics when not needed can harm health	No	Mean	4.56	0.5	211	4.41	0.55	206	4.56	0.48	211	4.52	0.48	206	62	No	**p<0.01 intervention vs control in time 1
			Attitudes towards aspects of antibiotic use	No														62	No
			4. I amin favour of asking a doctor or dentist for antibiotics if I think I need them	No	Mean	2.88	1.25	211	2.9	1.29	206	2.78	1.18	211	2.85	1.23	206	62	No
			5. I expect a doctor or dentist to prescribe antibiotics if I say I need them.	No	Mean	2.25	1.32	211	2.27	1.25	206	2.07	1.2	211	2.16	1.15	206	62	No
			6. It is best to avoid taking antibiotics unless recommended by my doctor/dentist	No	Mean	4.77	0.45	211	4.63	0.59	206	4.64	0.61	211	4.6	0.65	206	62	No	**p<0.01 intervention vs control in time 1
			7. It is important to question your doctor or dentist about whether I really need to take antibiotics.	No	Mean	4.37	0.62	211	4.31	0.74	206	3.85	0.87	211	3.84	0.85	206	62	No
			8. It is not a good idea to self-medicate on antibiotics (e.g. using up antibiotics left over from a previous course or someone else’s previous treatment).	No	Mean	4.64	0.76	211	4.64	0.69	206	4.64	0.72	211	4.64	0.75	206	62	No
			9. When prescribed antibiotics by my doctor or dentist, it is always a good idea to ensure you use them all as prescribed, even if you feel better	No	Mean	4.69	0.58	211	4.63	0.62	206	4.57	0.74	211	4.55	0.71	206	62	No
			10. Buying antibiotics on the internet in order to treat yourself can be helpful	No	Mean	1.5	0.97	211	1.67	1.14	206	1.61	0.97	211	1.54	0.82	206	62	No
			11. I should not expect a doctor or dentist to prescribe antibiotics if they feel I do not need them	No	Mean	4.55	0.68	211	4.39	0.85	206	4.47	0.73	211	4.45	0.75	206	62	No	*p<0.05 intervention vs control in time 1
			Intentions	No
			12. I will not ask my doctor or dentist for antibiotics if I could do without.	No	Mean	4.37	0.84	211	4.15	1	206	4.21	0.89	211	4.31	0.76	206	62	No	*p<0.05 intervention vs control in time 1
			13. I plan to avoid treating myself with antibiotics (e.g., using-up antibiotics left over from a previous course or someone else’s previous treatment).	No	Mean	4.38	1.09	211	4.26	1.13	206	4.43	0.97	211	4.2	1.23	206	62	No	*p<0.05 intervention vs control in time 2
			14. I intend to buy antibiotics on the internet in order to self-medicate.	No	Mean	1.18	0.47	211	1.27	0.59	206	1.25	0.56	211	1.27	0.56	206	62	No
			15. I would avoid taking antibiotics unless recommended bymy doctor/dentist	No	Mean	4.62	0.69	211	4.5	0.78	206	4.5	0.78	211	4.51	0.74	206	62	No
			16. I will question my doctor or dentist about whether I really need to take antibiotics even if they suggest them.	No	Mean	3.38	1.16	211	3.37	1.11	206	3.48	1.1	211	3.41	1.09	206	62	No
			17. When prescribed antibiotics bymy doctor or dentist, I will ensure I take them all as prescribed, even if I feel better.	No	Mean	4.64	0.64	211	4.5	0.88	206	4.54	0.75	211	4.52	0.76	206	62	No
			18. I will keep any leftover antibiotics I have to use if I need them.	No	Mean	2.8	1.35	211	2.78	1.39	206	1.8	1.04	211	1.65	0.9	206	62	No

## Sheet: Charac.Bef-Aft No Control group
Study ID	Author	title	year	Design of study	Aim of study	Country	Population	Total no. randomised (or total pop. at start of study for NRCTs)	Clusters (if applicable, no., type, no. people per cluster)	Note:	Sample size (including power calculation & statistical analysis)	Recruitment methods	Start and end date	Total study duration	Intervention name	No. Participant to group (specify whether no. people or clusters)	Description (include sufficient detail for replication, e.g. content, dose, components)	It used of social media in public health interventions	The messaging used in these public health interventions	Duration of intervention	Duration of follow-up	Theoretical framework employed in intervention design	Outcomes name	Definition of outcomes	Unit of measurement (if relevant)	Scales: upper and lower limits (indicate whether high or low score is good)	Is outcome/tool validated?	Imputation of missing data (e.g. assumptions made for ITT analysis)	How was the outcome measure collected? Telephone survey, mail survey, in person by trained assessor, routinely collected data, other	Sources of funding	Key conclusions of the study authors
6	R. Ahmed , A. Bashir, J.E.P. Brown, J.A.G. Cox, A.C. Hilton, C.E. Hilton, P.A. Lambert, E. Theodosiou, J.Q. Tritter, S.J. Watkin, T. Worthington	The drugs don’t work: evaluation of educational theatre to gauge and influence public opinion on antimicrobial resistance	2019	Pre-questionnaire to record audience knowledge, attitudes & opinions on AMR -- Educational play (presented on three separate occasions on the Birmingham think tank science museum in April 2017 & the Cheltenham science festival in June 2017) -- Post-questionnaire to record audience knowledge, attitudes & opinions on AMR	To increase public awareness of antimicrobial resistance (AMR) via educational theatre.	U.K.	The public (i.e. school, family & adult audiences)	105 people attended the Cheltenham science festival (mean age: 47 years old, range: 17-94 years old); 137 people attended the think tank presentation (mean age: 23 years old, range 6-67 years old)	N/A		N/A	N/A	Two presentations in April 2017; And the third presentation in June 2017	N/A	"The drugs don't work"; trailer: https://www.youtube.com/watch?v=qL32XmoqfvU; full version: https://www.youtube.com/watch?v=2dMJIm3Qwqg	242 people	It was an educational play consisting of 3 acts. The 1st act presented a fictional story of a pop singer who had a sore throad before doing a live performance; she sought treatment and was given a course of antibiotics. The 2nd act showed an investigation of the attitudes towards the use of antibiotics, in which the singer after doing a successful performance, she felt better and decided to stop …	N/A	The intervention was a play that could be booked at the following two different venues: https://www.birminghammuseums.org.uk/thinktank & https://www.cheltenhamfestivals.com/science-/ and its trailer: https://youtu.be/qL32XmoqfvU	36 minutes and 18 seconds	N/A	The script of the play was based on the antibiotics e-bug young adult educational resource documents for 15-18 years old students following British key stages 4 & 5 in science that relate to AMR (Public Health England. Antibiotics-e-Bug. London: PHE. On line resource 2016. Available at: https://publichealthmatters.blog. gov.uk/2016/02/08/e-bug-educating-young-people-on-microbes- and-antimicrobial…	Audience knowledge & understanding of AMR	The audience would record their responses that would reflect their knowledge and understanding of AMR via pre & post questionnaires to the play.	N/A	A likert scale, where 1 = "strongly disagree" and 5 = "strongly agree"	N/A	N/A	Pre and post questionnaires.	The work was supported by the UK Engineering and Physical Sciences Research Council: Bridging the Gaps between Engineering and Physical Sciences in Antimicrobial Resist- ance as part of the UK Cross-Research Council Initiative on Antimicrobial Resistance Grant No. EP/M02735X/1.	Educational theatre represents an innovative, simple way that have a positive impact on the knowledge, understanding and attitudes towards AMR.
15	Jennifer Hall, Leah Jones, Gail Robertson, Robin Hiley, Dilip Nathwani, Meghan Rose Perry	‘The Mould that Changed the World’: Quantitative and qualitative evaluation of children’s knowledge and motivation for behavioural change following participation in an antimicrobial resistance musical	2020	Quantitative: online pre-questionnaire then musical workshop intervention then post-questionnaire two weeks after the performance. Qualitative: 29 children randomly picked from each school to participate in a semi-structured focus groups before the musical intervention and two weeks after the performance.	To enhance children's knowledge of antibiotic resistance via a musical.	U.K.	Primary school students	1. Quantitative study: 182 participating students, age group: 9-11 (94 from Scotland and 88 from England). 2. Qualitative study: 29 students picked randomly to participate in focus groups (15 from Scottish school & 14 from English school)	N/A		N/A	Primary schools in Edinburgh & London were contacted via phone.	N/A	N/A	"The mould that changed the world"	1. Quantitative study: 182 participating students, age group: 9-11 (94 from Scotland and 88 from England). 2. Qualitative study: 29 students picked randomly to participate in focus groups (15 from Scottish school & 14 from English school)	A primary school musical that was developed in close collaboration between a musical composer and an infectious disease doctor. It starts from the discovery of penicillin and goes on to modern antibiotic use and the rise of its resistance.	N/A	N/A	Around 50 minutes.	For the quantitative study: 6 months after the study only in Scotland.	Based on the discovery of penicillin throughout the life of Fleming and goes afterwards to modern antibiotic use and the rising of its resistance, which was scientifically and historically correct.	Knowledge gain	Via a quantitative study: The students would answer questions in pre and post questionnaires that reflect their knowledge gain after watching the musical. Via the qualitative study: the students implied better understanding for antimicrobial resistance and the risks of overuse of antibiotics.	N/A	For the quantitative study: 32 true or false questions and open ended questions in the 6-month post intervention questionnaire. The more true answered questions, the better the performance.	N/A	N/A	For the quantitative part: pre & post intervention questionnaires	This study was funded by British Society of Antimicrobial Chemotherapy (www.bsac.org.uk) and funds awarded to author RH. The funders had no role in study design, data collection and analysis, decision to publish or preparation of the manuscript.	For the quantitative part: 1. knowledge gain was reflected by the children's ability to answer questions correclty on the post intervention questionnaire. 2. long term knowledge gain was reflected by a level of correct answers that's consistent between the 2-weeks and 6-months post musical questionnaire. For the qualitative part: the children showed better understanding of antimicrobial resistanc…
16	Amy Hai Yan Chan1,2, Rob Horne1*, Helen Lycett3, Eva Raebel3, Jordi Guitart3, Emilie Wildman1,3 and Karen Ang	Changing Patient and Public Beliefs About Antimicrobials and Antimicrobial Resistance (AMR) Using a Brief Digital Intervention	2021	Pre- and post-intervention study	To examine whether a brief, online algorithm-based intervention can change beliefs that may lead to inappropriate antibiotic demand	United Kingdom	100 participants -18 years or older, and residing in the United Kingdom	100	NA	As a quality assurance check, a minimum study completion time was used to determine response validity. Participants who completed the study in less than 101 s were excluded new participant was recruited as a replacement until the target sample size of 100 participants was reached. Using this approach, tenparticipants were excluded and replaced during the study.	N/A	81 were recruited via the Amazon mTurk platform, and 19 from research networks.	NA	NA	algorithm-based digital intervention	100	The profiling tool was repeated immediately after the intervention and compared with baseline scores to assess change in beliefs	No	https://www.frontiersin.org/articles/10.3389/fphar.2021.608971/full#supplementary-material		101S<	Necessity Concerns Framework in a reverse fashion (NCF-R) and and principles of behaviour change	Perception	changing perceptions of antibiotic necessity and lack of concern about antibiotic harm before and after getting exposed to behaviour change messages according to participant responses to the profiling questionnaire	N/A	None	Statements assessing participants’ beliefs about antibiotics and AMR were adapted from the Beliefs about Medicines questionnaire (BMQ), a widely-used and validated questionnaire that identifies individual’s beliefs about treatment. (Horne et al., 1999)	None	online study participant-recruitment platform hosted via Amazon where participants are reimbursed with small monetary rewards for completion of online tasks such as questionnaires or surveys	This project was supported by a Digital Catalyst grant from Innovate UK, grant number 133412, awarded to Spoonful of Sugar Ltd., a UCL-Business spin-out company.	This is the first study to demonstrate that patient beliefs about antibiotics and AMR associated with inappropriate demand can be changed by a brief, tailored digital intervention that applies the NCF in novel way (i.e. in reverse–as the NCF-R). This intervention has potential to reduce inappropriate antibiotic use and AMR, and generates new knowledge on shifting beliefs about antibiotics and AMR.
21	Ahmed, R and Bashir, A and Brown, J E P and Cox, J A G and Hilton, A C and Jordan, S L and Theodosiou, E and Worthington, T	Aston University's Antimicrobial Resistance (AMR) Roadshow: raising awareness and embedding knowledge of AMR in key stage 4 learners	2020	Before and after without no control group (pre-post)	To develop an interactive collection of workshops at Aston University (Birmingham, UK), which offered LOtC to KS4 students with the aim of raising awareness and understanding of AMR.	UK	Three academies participated in the AMR roadshow: Wood Green Academy (Wood Green Rd, Wednesbury WS10 9QU), Walsall Academy (Lichfield Rd, Bloxwich, Walsall WS3 3LX) and Aston University Engineering Academy (AUEA), (1 Lister St,Birmingham B7 4AG).	159 students: Wood Green Academy (n=30), Walsall Academy (n=52), AUEA (n=77).	Not applicable		Not reported	Not reported	Not reported	One-day event	The AMR roadshow	The AMR roadshow was attended by 159 students	The event comprised 4 interactive workshops (page 2): (1) Introduction to Microbiology and AMR (Determining pre-existing knowledge of Microbiology and AMR.) (2) Infection and the Superbug Methicillin Resistant Staphylococcus aureus (MRSA) (Infection and the Superbug MRSA) (3) Antibiotics: history of antibiotics, how antibiotics work, AMR on a global scale, the 5 mechanisms through which bacteria …	It was an event however authors attached video link on YouTube: Section 1: The beginning of microbiology: https://www.youtube.com/watch?v=eQ0Z1gzhndg Section 2: Infection and the superbug MRSA: https://www.youtube.com/watch?v=00RvoJSBn1A Section 3: Antibiotics: https://www.youtube.com/watch?v=qRIR-X7N2VI Section 4: Molecules to man: https://www.youtube.com/watch?v=zeRmpaCeAmU	Authors attached video link on YouTube:	One-day event Video section 1: 3:25 min Video section 2: 2:42 min Video section 3: 3:00 min Video section 4: 1:54 min	The pre-event questionnaire was issued to all participants on attendance at the AMR Roadshow for completion in workshop. Post-event questionnaires were issued for completion and collection following the AMR Roadshow at the end of the event. To determine retention of AMR knowledge over an extended period postevent, identical questionnaires containing the unique code identifiers were issued to acad…	It is not clear	Retention of AMR knowledge	knowledge of antibiotics and AMR was assessed through a standardised questionnaire. Each questionnaire was assigned with a unique code identifier.		Student questionnaire responses relating to knowledge and understanding of AMR through Likert Scale and Multiple Choice Type Questions (MCQs) questions over time. *MCQs which were corrected to binary (correct/incorrect) for analysis *Standard 5-point Likert scales where 1="very unlikely/not important” and 5="very likely/very important”	It is not clear	The total number of fully completed questionnaires were: preevent (n=80), post event (n=74), six weeks (n=70), 3 months (n=72).	Post-event questionnaires were issued for completion and collection following the AMR Roadshow at the end of the event. To determine retention of AMR knowledge over an extended period postevent, identical questionnaires containing the unique code identifiers were issued to academies for subsequent distribution to their students at 6 and 12 weeks.	The work was supported by the UK Engineering and Physical Sciences Research Council: Bridging the Gaps between Engineering and Physical Sciences in Antimicrobial Resistance, as part of the UK cross-Research Council Initiative on Antimicrobial Resistance (AMR) Grant number EP/M02735X/1.	*The findings from this study demonstrated that the level of pre-existing knowledge and awareness amongst the KS4 academy cohort with regards to antibiotics and AMR varied considerably. * What is clear from our findings is that young learners are aware of basic AMR issues, including MRSA and the importance of handwashing, but are less aware of ‘how’ to wash hands properly or ‘how’ AMR occurs. Man…
22	Susi Ari Kristina, Nada Nisrina Salsabila, Yulianto Yulianto, Gerhard Fortwengel.	Effect of didactic educational intervention on improving knowledge of antibiotics use and resistance in Yogyakarta Community	2021	, 2 hour session of course and case discussion, post-questionnaire	To evaluate the effects of pharmacist-initiated educational intervention on promoting appropriate use of antibiotics and reducing self medication with antibitoics.	Indonesia	Pharmacy customers	268 participants			N/A	Adult residents living in Yogyakarta were invited to join the course held by Gema Cermat pharmacists team.	2019-05-01	N/A	A 2 hour session of course & case discussion	268 participants	The methods and content of the educational course were validated by practicing pharmacists . Content validity index was used to assess the items' relevancy with the module constructs.	N/A	N/A	2 hour session of course	N/A	N/A	Knowledge on antibiotic use and resistance	Via a quantitative study: a total of 268 participants would answer and pre and 2 weeks post questionnaire that would reflect their knowledge on antibiotics use and resistance.	N/A	Two sets of questions, the first consists of 11 True or False questions and the second set consists of 4 True or False questions. The more True questions the better the knowledge.	Yes.	N/A	Pre and post questionnaires.	None to declare.	The educational intervention, initiated by pharmacists, positively improved the public's knowledge and practice regarding antibiotics use in Yogyakarta.	The post questionnaire was 2 weeks after the course.
25	Rabbani, S A and Sridhar, S B and Abazer, D and Ahmed, H S and Usman, H A and Mahtab, A and El-Dahiyat, F	Impact of community-based educational intervention on antibiotic use and resistance awareness among the people living in Ras Al Khaimah, United Arab Emirates	2020	pretest-post-test experimental design	usefulness of an educational intervention in increasing antibiotic-related awareness of the public.	Ras AI Khaimah, United Arab Emirates	People more than 18 years of age, of either gender, willing to give written informed consent and living in Ras A1 Khai- mah were included in the study.	100	NA		100	Participants were recruited using the convenience sampling technique.	NA	Not given	Community-based educational intervention	110	Participants were recruited using the convenience sampling technique.	No		4 weeks	After 4 weeks		Knowledge gained	to explore the usefulness of a community-based educational intervention in raising awareness about AMR.			Yes, the WHO questionnaire was used to assess the baseline knowledge (pretest) regarding antibiotics and their resistance.	None		No funding	Follow- ing the intervention, antibiotic-related awareness was signifi- cantly improved. Further efforts should be made to ensure that this improved awareness is converted to necessary health behaviour changes in the long term.
27	Khoshgoftar, Mohadeseh and Zamani-Alavijeh, Fereshteh and Kasaian, Nazila and Shahzamani, Kiana and Rostami, Soodabeh and Nakhodian, Zari and Pirzadeh, Asiyeh	The effect of public health educational campaign regarding antibiotic use and microbial resistance on knowledge, attitude, and practice in the Iran.	2021	Before and after without no control group (pre-post)	to describe the knowledge, attitude, and practice regarding antibiotic resistance and the effect of the educational intervention of people that live in Esfahan.	Iran	Public population	A total of 708 people participated		They were not same in pretest and posttest	Not reported	During the campaign, experts answered questions about antibiotics and how to use them, how to develop antibiotic resistance, and ways to prevent bacterial infections.	2019-10-01	After 1 week and visiting stations and exposed to messages, a posttest were done and data gathered.	Educational campaign	Before intervention (n=708) After intervention (n=708)	The team of researchers designed, tailored messages on antibiotic resistance, such as rest during colds, the lack of antibiotics in viral diseases, the effects of arbitrary antibiotic use, and the need to prescribe medication. The messages are then created by the graphics team with clear and engaging images, as well as the use of cultural elements in campaign areas to get people’s attention. Afte…		Different styles were used in designing the messages such as informative style (increasing awareness about antibiotic resistance, the difference between virus and bacterium and lack of antibiotic effect on viral diseases) and persuasive style (the use of drugs prescribed by a doctor, the need to rest during a cold). Various tools and variations in content, shape, and color were used in the poster…	1 week	-	It is not clear	Knowledge	It is not clear (22 items)		It is no clear During the campaign, experts answered questions about antibiotics and how to use them, how to develop antibiotic resistance, and ways to prevent bacterial infections	The validity was assessed by 10 specialists in health education and infectious disease and CVR (Content Validity Ratio) was calculated by 3-point scale (necessary, useful but not necessary, and not necessary) according to Lawshe table, CVRs above 0.62 were retained. CVI (Content Validity Index) was calculated by 4-point Likert scale for each item (1 = not clear, 2 fairly clear, 3 = clear, and 4 =…	-	The questionnaires were completed by self-administered. After gathering data in the target areas, five specialists were stationed at the stations (busy places in the city).	This article is the result of a research proposal (298132) that approved by the Isfahan University of Medical Sciences.	*The main results of this study demonstrated that after the educational campaign, people’s awareness of antibiotic resistance increased. * The level of awareness and attitude of the people studied after the educational intervention was significantly higher than before the intervention *In the absence of urgent corrective and protective actions, the world is heading toward a postantibiotic era, in…
																							Attitude	It is not clear (10 items)
																							Practice of antibiotics’ use and miss-use	It is not clear (5 items)
29	Vicki L Young1, Mark Berry2, Neville Q Verlander3, Andy Ridgway2 and Cliodna AM McNulty1	Using debate to educate young people in schools about antibiotic use and resistance: A before and after evaluation using a questionnaire survey	2019	before and after evaluation using a questionnaire survey	The aim of this study was to investigate the ability of the debate kit to increase knowledge and awareness of antibi- otic and antibiotic resistance in secondary school students aged 13–16 years	England	Secondary schools in three regions across South West England	235	7 schools			Schools were approached via letter, email and phone call	June and July 2016.		Educational intervention	235	Seven schools (five rural and two city) agreed to participate. Three private schools, three state comprehensive schools and one University Technical College took part.	No				McNemar’s test,	increase knowledge and awareness of antibiotic and antibiotic resistance		Each of the 16 questions and the derived percentage variable were analysed separately. When the outcome was binary, the regression model used was logistic and for the percentage outcome variable it was normal linear.		Yes, the questionnaire was based on e-Bug evaluation questionnaires used in previous stud- ies (Hale et al., 2017; Young et al., 2017). A copy of the questionnaire is included in Appendix 1.		Students were asked to complete a knowledge question- naire before the lesson began and again immediately after the lesson.	No funding	The results suggest that the e-Bug antibiotic resistant debate kit is able to improve knowledge in young people around antibiotics and antibiotic resistance. Furthermore, the lesson was enjoyed by students and therefore this resource should be promoted more widely to teachers and schools.
33	Alexander R Hale1, BSc (Hon), MSc; Vicki Louise Young2, BSc (Hons), PhD; Ann Grand3, BA, PhD; Cliodna Ann Miriam McNulty2, MBBS, FRCPath	Can Gaming Increase Antibiotic Awareness in Children? A Mixed-Methods Approach	2017	mixed methodological approach - questionnaire and focus group	The aim of this study was to appraise young people’s opinions of 3 antibiotic games on the e-Bug student website, exploring children’s views and suggestions for improvements, and analyzing change in their knowledge around the learning outcomes covered.	United Kingdom	Students aged 9-11 years in primary schools and summer schools in the Bristol and Gloucestershire area	153	1 school and 1 summer school		153	The authors invited, by email and telephone	NA	NA	Gaming based educational intervention	* The research was carried out in groups of around 30 pupils at a time. * 6 to 8 pupils to take part in a focus group at each venue * A think-aloud session followed the focus group. One pupil was selected randomly from the focus group at each venue and asked to describe their thoughts and feelings as they played the games.	A mixed methodological approach was undertaken, wherein 153 pupils aged 9-11 years in primary schools and summer schools in the Bristol and Gloucestershire area completed a questionnaire with antibiotic and microbe questions, before and after playing 3 e-Bug games for a total of 15 minutes. The after questionnaire also contained open-ended and Likert scale questions. In addition, 6 focus groups w…	No			NA	Likert scale	analyzing change in their knowledge		Questionnaire, focus group and think aloud sessions	None	The questionnaire asked 7 simple multiple-choice questions adapted from a previous e-Bug evaluation	All incomplete answers in section 1 of the questionnaire were marked as wrong for data analysis. Questions with more than 1 answer ticked and incomplete answers in section 2 of the questionnaire were not included in the data analysis.	Students were asked to complete a knowledge questionnaire before the lesson playing the game		This study shows that 2 of the e-Bug antibiotic educational games are valuable. “Body Busters” effectively increased antibiotic knowledge in children and had the greatest flow and enjoyment
34	VickiL.Young1 ,AmyCole1,DonnaM.Lecky*,DennisFettis2,BethPritchard2,NevilleQ.Vertander*, Charlotte V. Eley* and Cliodna A. M. McNutty*	A mixed-method evotuotion of peer-education workshops for school- aged children to teach about ontibiotics, microbes and hygiene	2017	Mixed method before and after study - (Quantitative: before and after + Qualitative: Interviews)	Our objectives are to evaluate the effectiveness of using peer education to improve young people’s knowledge about hygiene and antibiotic use. We will also assess the teacher and peer educator attitudes to running the workshops in their schools.	England	All secondary school students were Year 8, aged 12—13 years.	Secondary school - 476 students Primary School - 589	Students attended the worksnop in groups of between 20 and 30.		N/A	All secondary schools in these regions were approached via letter and e-mail, or through the county council’s Healthy Living and Learning schools programme	2013 -- Quantitative: 2013 and followup was 6 weeks after intervention and hence, still in 2013. Qualitative: interviews after intervention and hence: 2013	The intervention, followup and interview were in 2013	Peer education based educational intervention	Students attended the worksnop in groups of between 20 and 30. A short introduction was delivered before tne students split into five groups	The science show consists of five interavtive stands covering the topics of microbes, hand hygiene, respiratory hygiene, food hygiene and antibiotics.	No	NA	6 weeks plus	after 6 weeks	Mixed-effect logistic regression and mixed-effect linear regression were used to analyse the data -- The e-bug educational program	Knowledge gained	Knowledge gained about hygiene, the spread of infection and antibiotics.	Questionnaire, focus group and interviews		Yes, previously developed e-bug questionnaire was used	Students wno had left any Question blank were omitted from the analysis of that particular section	Before, after and knowledge-retention questionnaires were used to evaluate the effect of tne intervention. Knowledge-retention questionnaires were completed 6 weeks post intervention.	This work was supported by Public Health England and the British Society for Antimicrobial Chemotheropy.	This study indicates that peer education is an effective way to educate young people on important topics around health and hygiene, and to concurrently improve communication skills. Its use should be encour- aged across schools to help in the implementation of the National Institute for Health and Core Excellence (NICE) guidance that recommends children ore taught in on age-appropriate manner abo…
35	CrystalM.Davida,KatherineS.O'Nealb,MichaelJ.Millerc,JeremyL.Johnsond andAnnE.Lloyde	A literacy-sensitive approach to improving antibiotic understanding in a community-based setting	2017	prospective pretest-post-test study design	This pilot feasibility study was designed to (1) develop and deploy a programme to enhance patient knowledge about antibiotic use; (2) estimate an effect size for whether providing patient education is associated with improvements in antibiotic knowledge; and (3) explore the association between antibiotic knowledge and health literacy	USA	Participants were required to be >18 years old and English speaking.	28	N/A		28	Information was posted on the YMCA website, and fliers were placed at the reception desk for each YMCA facility as well as on church bulletin boards. Additionally, staff at the respective facilities advertised to their customers through word of mouth	NA	N/A	A community-based educational seminar	28	Using a prospective pretest-post-test study design, 60-min live educational seminars about appropriate antibiotic use were offered to community-dwelling participants - Materials were adapted from the Michigan Antibiotic Resistance Reduction Coalition, the Oregon Health Authority, and Oregon AWARE (Alliance Working for Antibiotic Resistance Education).The presentation consisted of 32 slides with t…	No	The presentation consisted of 32 slides with the following content: a discussion on the differences between viruses and bacteria; examples of when treatment with antibiotics is appropriate; how antibiotics work; defi nition of antibiotic resistance and examples of what could cause antibiotic resistance; and steps the audience could take to decrease the misuse of antibiotics. The educational progr…	60 minutes educational live seminars	N/A	Materials were adapted from the Michigan Antibiotic Resistance Reduction Coalition, the Oregon Health Authority, and Oregon AWARE (Alliance Working for Antibiotic Resistance Education)	explore the association between antibiotic knowledge and health literacy - Antibiotics knowledge	N/A	The Kuder-Richardson Formula 20 (KR-20) was used to assess internal consistency for each knowledge index measure. The Wilcoxon signed rank test was used to evaluate changes in the pre- and post-test scores for each knowledge item. A dependent samples t-test was used to compare pre- and post-test knowledge index scores.	N/A	No	N/A	In person	This work was supported by the American College of Clinical Pharmacy Ambulatory Care PRN Grant [C5082751].	A community-based educational seminar on appropriate antibiotic use can effectively increase patient understanding of their role in antibiotic stewardship and combat the inappropriate use of antibiotics.

## Sheet: Result Bef-Aft No Control group
Study ID	Intervention name	Outcome	Subgroups (if applicable)	Outcome Measure of result (nº, Mean, Median, %)	Result of measure before intervention (if applicable and study report it)	measure dispersion (SD, range)(or other variance) if the measure is mean or median	Total participants before Intervention	Proportion or percentage calculated (if the study reports it)	Result of measure after intervention (if applicable and study report it)	measure dispersion (SD, range)(or other variance) if the measure is mean or median	Total participants after intervention	Proportion or percentage calculated (if the study reports it)	Measure (Mean, Median, %) if report change from before-after	Change of measure	measure dispersion (SD, range) (or other variance)	Total participants	No. of missing participants and reasons	Any other results reported	Statistical methods used and appropriateness of these methods (e.g. adjustment for correlation	pg & fig/tabla	Note:
6	The drugs don't work	Audience knowledge & understanding of AMR	105 people attended the Cheltenham science festival (mean age: 47 years old, range: 17-94 years old); 137 people attended the think tank presentation (mean age: 23 years old, range 6-67 years old)	Pre and post questionnaires, consisting of 8 questions. And each questions would be answered based on a likert scale, where 1 = "strongly disagree" and 5 = "strongly agree"	Mean scores for the science festival audiences were low for question 5 and high for questions 6 and 8.	N/A	For the Cheltenham science festival: 105 participants; For the think tank presentation: 137 participants.	N/A	1. Scores for questions 1 and 2 imply that he play had a positive influence on increasing the knowledge in areas of antibiotics and microbiology and awareness on AMR for all audiences. 2. Scores for question 3 implied that the play improved appreciation of lack of the tests available to differentiate between bacterial and viral throat infections in primary care. 3. Decresed scores for question 4 …	N/A	For the Cheltenham science festival: 105 participants; For the think tank presentation: 137 participants.	N/A	N/A	1. Significant altered scores for questions 1,2,3,4, and 7 (P-value < 0.05) for audiences of both the Cheltenham science festival and the think tank presentation. 2. Significant changes in scores for questions 5,6, and 8 were clear for the think tank audiences.	N/A	242 people	N/A	The think tank audiences was the majority of students: 87/137 in key stage 4 age group. On the other hand, the Cheltenhamaudience made the majority of adults: 97/105.	Caculation of P-values by Wilcoxon matched pairs test of all self-assessed scores for the questions. The questions that didn't change from pre-post questionnaire were also included.	Fig. 1, p. 195; Table 1: questions posed to the audience pre and post performance of the play, p. 196.
15	"The mould that changed the world"	Knowledge gain	1. Quantitative study: 182 participating students, age group: 9-11 (94 from Scotland and 88 from England). 2. Qualitative study: 29 students picked randomly to participate in focus groups (15 from Scottish school & 14 from English school)	For the quantitative part: pre & post intervention questionnaires. 32 true or false questions and open ended questions in the 6-month post intervention questionnaire.	Table 1, p. 5/16	N/A	For the quantitative study: n=180 (pre musical)	N/A	Table 1, p. 5/16	N/A	For the quantitative study: n=161 (after 2 weeks).	N/A	N/A	1. Bacteria can become resistant to antibiotics (OR 4.63, C.I. 2.46-9.31, P<0.0001). 2. Antibiotic resistant infections can be life threatening (OR 3.26, C.I. 1.76-6.32, P = 0.0001). 3. Prudent use of antibiotics will slow the rise of antibitic resistant infections (OR 2.16, C.I. 1.39-3.38, p = 0.0006). 4. Long term knowledge gain was reflected by a consistent level of correct answers between the…	N/A	182	There's a difference in response numbers for pre and 2 weeks and then 2 weeks & 6 months post musical questionnaires. Pre: 180, 2 weeks post: 161 and then 2 weeks post: 89, 6 months post: 67.	For the qualitative part: The theoritical domains frameowrk (TDF) was used to lead the exploration of behavior and what its determinants were.	1. Generalized linear models (GLMs) with binomial error distributions. 2. Variables that explained significant amount of variations in correct answers were identified by comparing models including and excluding each variable using likelihood ratio tests. 3. Results were reported as odds ratio (OR) adjusted for any confounding factors.	fig1: pathway to impact on antimicrobial resistance through raising awareness in children, p 3/16; Table 1 True/ False questionnaire responses from participating children pre-musical and post-musical, p 5/16; fig 2 improvement in children's knowledge pre-musical and two weeks post musical, p 7/16; Table 2 selected focus group (n=29) responses from participating children pre- and two weeks post-mu…	1. A part has to be added for details about the qualitative part of the study: what framework was used? What method of analysis was used? 2. Numbers are incorrect. They have to be reviewed. ex.: one n=30 and n=29 for qualitative. Numbers need to be reviewed. 3. The writing for results for pre and post questionnaires per every question is problematic.
16	algorithm-based digital intervention	Necessity subscale (higher scores, higher perceived need for antibiotics)		Mean			100				100		Mean							Page 5, Table 2
		I need antibiotics because I feel really ill			1.76	0.79			1.3	0.61				-0.46	0.73
		I need antibiotics now because I am not getting any better My body can tell me when I need antibiotics			1.93	0.87			1.31	0.69				-0.62	0.85
		My body can tell me when I need antibiotics			1.8	0.8			1.33	0.64				-0.47	0.77
		I need antibiotics because I’ve been ill for more than 3 days			1.54	0.77			1.21	0.52				-0.33	0.79
		Getting an antibiotic is proof that I am ill			1.59	0.81			1.27	0.63				-0.32	0.83
		Only antibiotics can make me feel better			1.37	0.63			1.15	0.39				-0.22	0.61
		It is best to take an antibiotic to be on the safe side			1.36	0.64			1.17	0.45				-0.19	0.61
		I can stop the antibiotics once I feel bettera			2.46	0.83			2.78	0.52				0.32	0.74
		Concerns subscale (higher scores, higher concerns about antibiotics)
		I am concerned about antibiotic resistance			2.64	0.66			2.85	0.51				0.2	0.57
		Antibiotics are harmless			2.56	0.63			2.84	0.44				0.29	0.62
		Taking a short course of antibiotics will not cause side effectsa			2.41	0.67			2.84	0.44				0.44	0.74
		Perceptions subscale (higher scores, more accurate perceptions about antibiotics and resistance)
		There is not much I can do to help reduce antibiotic resistance			2.55	0.63			2.78	0.52				0.23	0.69
		Using lower doses of antibiotics can help reduce risk of antibiotic resistance			2.11	0.74			2.64	0.64				0.53	0.74
		Taking an antibiotic I don’t need will increase the risk of antibiotic resistancea			2.74	0.54			2.69	0.66				-0.05	0.78
		Antibiotic resistance is when people become resistant to the bacteria			2.71	0.57			2.83	0.49				0.12	0.54
		Antibiotic resistance is when bacteria become resistant to the antibiotica			2.84	0.42			2.92	0.34				0.08	0.46
		New antibiotics will be developed in the future Overall mean change–knowledge subscale Overall change–total knowledge subscale			1.44	0.52			1.61	0.65				0.17	0.79
21	The AMR roadshow	Retention of AMR knowledge: MCQs which were corrected to binary (correct/incorrect)	No	%	3 out of 11 (27%) were answered correctly	-	80	50% or more of the cohort	9 out of 11 (82%) were answered correctly	-	74	50% or more of the students	-	-	-	-	Pre-event=79 uncompleted questionnaires	See figure 1, page 4	The non-parametric Wilcoxon matched-pairs test was used to compare the Likert scores for pre- and post-performance responses for each question. It is not clear because they used a non-parametric method if they reported mean. If the data was not normally distributed why they used mean.	Page 3 and Figure 1 (all results are in the figure 1)	Pre-AMR roadshow MCQ questionnaire responses demonstrated that participants had an existing knowledge (as indicated by >50% initial correct responses) of MRSA, stages of handwashing and what antibiotic resistance means. Initial knowledge regarding issues including: minimum time for effective handwashing, natural antimicrobials, antibiotic production and preventing the spread of antimicrobial resi…
		Q14: What is the minimum time you should wash your hands for (e.g. after going to the toilet)?	No	%	-	-	-	-	-	-	-	a positive increase in knowledge was demonstrated in 91% of the MCQ with only Q14 demonstrating a decrease in knowledge	-	-	-	-
		Regarding the Likert Scale questions Handwashing in preventing the spread of AMR (Q11), washing your hands properly (Q6) and following potential exposure to microorganisms (Q5)	No	Mean	a good level (mean response >4) of pre-existing knowledge	-	-	-	-	-	-	-	-	-	-	-					*There was no significant difference in responses based on academy or gender (p> 0.05). *Ethnicity was not significantly associated with the participants’ questionnaire responses *The AMR roadshow improved knowledge and understanding of AMR (as demonstrated by a positive change in accuracy of responses to the 11 MCQ questions and a positive change in response to the 5 Likert Scale questions) acro…
		6-stages of handwashing (Q3) and the potential use of natural products to treat infection (Q8)	No	Mean	Less knowledge (mean response <3.5)	-	-	-	-	-	-	-	-	-	-	-
22	A 2 hour session of course & case discussion	Knowledge on antibiotic use and resistance	N/A	Pre and post questionnaires, consisting of two sets of questions, the first consists of 11 True or False questions and the second set consists of 4 True or False questions. The more True questions the better the knowledge.	24.36% of participants correctly knew that antibiotics don't work on cold and cough. 32.57% of the participants agrees that antibiotics can't treat a sore throat. 76.88% believed that antibiotics can be purchased without prescription. 43.24% answered that leftover antibiotics are not good to keep at home. 44.78% were aware that overuse of antibiotics can lead to antibiotic resistance. 19.33% were…	N/A	268 participants	N/A	73.88% of participants correctly knew that antibiotics don't work on cold and cough. 58.21% of the participants agrees that antibiotics can't treat a sore throat. 90.14% of participants were aware that antibiotics kill bacteria and 66.04% knew that antibiotics can't be used for viral infections. 98.88% knew antibiotics had to be purchased with prescription. 57.46% answered that leftover antibioti…	N/A	268 participants	N/A	N/A	49.52% of participants correctly knew that antibiotics don't work on cold and cough. 25.64% of the participants agrees that antibiotics can't treat a sore throat. 22% believed that antibiotics can be purchased without prescription. 14.22% answered that leftover antibiotics are not good to keep at home. 21.64% were aware that overuse of antibiotics can lead to antibiotic resistance. 29.92% were aw…	N/A	268 participants	N/A	N/A	A quasi-experimental study design	Table 1: profile of knowledge before and after intervention, p. 348; Table 2: profile of antibiotic practice, p. 349; Table 3: Domain of knowledge and practice before and after intervention, p. 349; figure 1: comparison of pre and post intervention results, p. 350.	Calculated change
25	Community-based educational intervention																			Pg 201, table 3
27	Educational campaign	Knowledge	No	Mean	23.27	4.33	708	-	38.96	5.67	708	-						p<0.001 before versus after	Analytical statistics including paired t-test were used. The statistically significance level was considered <0.05.	Table 1, page 3
		Attitude	No	Mean	15	3.99	708	-	25.61	3.24	708	-						p<0.001 before versus after
		Practice of antibiotics’ use	No	-	-	-	708				708							the number of people taking antibiotics last week has decreased significantly compared to before the intervention p=0.031).
		The last time to take antibiotics											-	-	-	-	-		It is not clear what method was used in this part to calculate value p, the paired t-test is a method used to test whether the mean difference	Table 2, page 4
		1 year ago	No	nº	252	-	708	35.6	253	-	708	35.7	-	-	-	-	-
		6 months ago	No	nº	144	-	708	20.3	166	-	708	23.4	-	-	-	-	-
		1 months ago	No	nº	167	-	708	23.6	155	-	708	21.9	-	-	-	-	-	p=0.031 before versus after
		last week	No	nº	105	-	708	14.8	94	-	708	13.3	-	-	-	-	-	p=0.048 before versus after
		No consumption	No	nº	40	-	708	5.6	40	-	708	5.6	-	-	-	-	-
		Source of antibiotic use				-				-			-	-	-	-	-
		Prescribed by a physician	No	nº	521	-	708	73.6	520	-	708	73.4	-	-	-	-	-
		Prepared by the pharmacy without a prescription	No	nº	100	-	708	14.1	99	-	708	14	-	-	-	-	-
		The remaining drugs at home	No	nº	51	-	708	7.2	51	-	708	7.2	-	-	-	-	-
		No answer	No	nº	37	-	708	5.2	37	-	708	5.2	-	-	-	-	-
		The reason for taking antibiotics				-				-			-	-	-	-	-
		Fever	No	nº	170	-	708	24	163	-	708	23	-	-	-	-	-	p=0.045 before versus after
		respiratory diseases	No	nº	63	-	708	8.9	81	-	708	11.4	-	-	-	-	-	p=0.028 before versus after
		Pain/inflammation	No	nº	110	-	708	15.5	127	-	708	17.9	-	-	-	-	-	p=0.012 before versus after
		Urinary tract infection	No	nº	65	-	708	9.2	56	-	708	7.9	-	-	-	-	-	p=0.041 before versus after
		Skin problem/wound	No	nº	37	-	708	5.2	35	-	708	4.9	-	-	-	-	-
		Others	No	nº	1	-	708	0.1	0	-	708	0	-	-	-	-	-
		No answer	No	nº	262	-	708	37	264	-	708	34.7	-	-	-	-	-
		Antibiotic use time				-	708			-	708		-	-	-	-	-
		Before meals	No	nº	35	-	708	4.9	44	-	708	6.2	-	-	-	-	-	p=0.024 before versus after
		after the meal	No	nº	206	-	708	29.1	212	-	708	29.2	-	-	-	-	-	p=0.039 before versus after
		With food	No	nº	31	-	708	4.4	31	-	708	4.4	-	-	-	-	-
		According to the doctor's instructions	No	nº	368	-	708	52	360	-	708	50.8	-	-	-	-	-
		No answer	No	nº	68	-	708	9.6	68	-	708	9.6	-	-	-	-	-
29	Educational intervention	increase knowledge and awareness of antibiotic and antibiotic resistance																		Pg 284 & 285
																				Table 1
33	Gaming based educational intervention	analyzing change in knowledge																		Pg 6 and 7
34	peer-education workshop	Knowledge gained																		Table 2 & 3, Pg 2122 & 2123
35	A community-based educational seminar	explore the association between antibiotic knowledge and health literacy - Antibiotics knowledge																		Table 2, Pg 396
