# Supplementary material for: Public Health Interventions to Improve Antimicrobial Resistance Awareness and Behavioural Change Associated with Antimicrobial Use: A Systematic Review Exploring the Use of Social Media
Source: Antibiotics (Basel). 2022 May 16;11(5):669. doi: 10.3390/antibiotics11050669 (PMC9137793; doi:10.3390/antibiotics11050669)
Supplement: Supplementary file 1 [file antibiotics-11-00669-s001.zip › File S4- Risk of bias.xlsx]

## Sheet: Type of study
		Sheet
	Risk of bias for studies with a separate control group - Randomised trials - Non-randomised trials - Controlled before-after studies	Tool 1
	Risk of bias for interrupted time series studies	Tool 2
	Quality Assessment Tool for Before-After (Pre-Post) Studies With No Control Group	Tool 3
ID	Title	Year	R1	R2	Design	Tool
6	The drugs don't work: evaluation of educational theatre to gauge and influence public opinion on antimicrobial resistance.	2020	Doaa	Sana	Before-After (Pre-Post)	3
8	Peer-education as a tool to educate on antibiotics, resistance and use in 16���18-year-olds: A feasibility study	2020	Sana	Doaa	randomised controlled	1
9	The effects of gamification on antimicrobial resistance knowledge and its relationship to dentistry in Saudi Arabia: a randomized controlled trial	2020	Doaa	Nathaly	single blind parallel group RCT	1
10	Development and randomized controlled trial of an animated film aimed at reducing behaviours for acquiring antibiotics	2021	Nathaly	Sana	Randomized controlled trial	1
13	Reducing expectations for antibiotics in primary care: a randomised experiment to test the response to fear-based messages about antimicrobial resistance.	2020	Sana	Nathaly	randomised experiment	1
15	'The Mould that Changed the World': quantitative and qualitative evaluation of children's knowledge and motivation for behavioural change following participation in an antimicrobial resistance musical	2020	Doaa	Sana	Before-After (Pre-Post)	3
16	Changing Patient and Public Beliefs About Antimicrobials and Antimicrobial Resistance (AMR) Using a Brief Digital Intervention	2021	Sana	Nathaly	Before-After (Pre-Post)	3
21	Aston University's Antimicrobial Resistance (AMR) Roadshow: raising awareness and embedding knowledge of AMR in key stage 4 learners	2020	Nathaly	Doaa	Before-After (Pre-Post)	3
22	Effect of Didactic Educational Intervention on Improving Knowledge of Antibiotics Use and Resistance in Yogyakarta Community	2021	Doaa	Nathaly	Before-After (Pre-Post)	3
25	Impact of community-based educational intervention on antibiotic use and resistance awareness among the people living in Ras Al Khaimah, United Arab Emirates	2020	Sana	Nathaly	Before-After (Pre-Post)	3
27	The effect of public health educational campaign regarding antibiotic use and microbial resistance on knowledge, attitude, and practice in the Iran.	2021	Nathaly	Sana	Before-After (Pre-Post)	3
29	Using debate to educate young people in schools about antibiotic use and resistance: A before and after evaluation using a questionnaire survey.	2019	Sana	Doaa	Before-After (Pre-Post)	3
30	The Consequences of AMR Education and Awareness Raising: Outputs, Outcomes, and Behavioural Impacts of an Antibiotic-Related Educational Activity in Lao PDR.	2018	Doaa	Nathaly	Controlled before-after studies	1
31	Educational intervention to enhance adherence to short-term use of antibiotics.	2019	Nathaly	Sana	Randomized controlled trial	1
33	Can Gaming Increase Antibiotic Awareness in Children? A Mixed-Methods Approach	2017	Sana	Nathaly	Before-After (Pre-Post)	3
34	A mixed-method evotuotion of peer-education workshops for school- aged children to teach about ontibiotics, microbes and hygiene	2017	Sana	Doaa	Before-After (Pre-Post)	3
35	A literacy-sensitive approach to improving antibiotic understanding in a community-based setting	2017	Sana	Doaa	Before-After (Pre-Post)	3

## Sheet: Tool 1
	Name of the person extrating data			Date:
	General Information
	Study ID
	Author
	Title of study
	Risk of bias assessment			Location in text pg & fig/table
	Domain	Review authors’ judgement	Description as stated in report/paper
		Low risk- High risk -Unclear
	Random sequence generation (selection bias)
	Allocation concealment (selection bias)
	Blinding of participants and personnel (performance bias)
	Blinding of outcome assessment (detection bias)
	Incomplete outcome data (attrition bias)
	Protection against contamination
	Selective outcome reporting? (reporting bias)
	Other caracterictic of risk
	Were baseline outcome measurements similar?
	Were baseline characteristics similar?
	References: Cochrane Effective Practice and Organisation of Care (EPOC). EPOC Resources for review authors, 2017. epoc.cochrane.org/resources/epoc-resources-review-authors

## Sheet: Tool 2
	Name of the person extrating data			Date:
	General Information
	Study ID
	Author
	Title of study
	Risk of bias assessment			Location in text pg & fig/table
	Domain	Review authors’ judgement	Description as stated in report/paper
		Low risk- High risk -Unclear
	Was the intervention independent of other changes?
	Was the shape of the intervention effect pre-specified?
	Was the intervention unlikely to affect data collection?
	Was knowledge of the allocated interventions adequately prevented during the study?
	Was incomplete outcome data adequately addressed?
	Selective outcome reporting
	Other risks of bias
	References: Cochrane Effective Practice and Organisation of Care (EPOC). EPOC Resources for review authors, 2017. epoc.cochrane.org/resources/epoc-resources-review-authors

## Sheet: Tool 3
	Name of the person extrating data			Date:
	General Information
	Study ID
	Author
	Title of study
	Assessment			Location in text pg & fig/table
	Domain	Review authors’ judgement	Description as stated in report/paper
		Yes(No/Other (CD, NR, NA)*
	1. Was the study question or objective clearly stated?
	2. Were eligibility/selection criteria for the study population prespecified and clearly described?
	3. Were the participants in the study representative of those who would be eligible for the test/service/intervention in the general or clinical population of interest?
	4. Were all eligible participants that met the prespecified entry criteria enrolled?
	5. Was the sample size sufficiently large to provide confidence in the findings?
	6. Was the test/service/intervention clearly described and delivered consistently across the study population?
	7. Were the outcome measures prespecified, clearly defined, valid, reliable, and assessed consistently across all study participants?
	8. Were the people assessing the outcomes blinded to the participants' exposures/interventions?
	9. Was the loss to follow-up after baseline 20% or less? Were those lost to follow-up accounted for in the analysis?
	10. Did the statistical methods examine changes in outcome measures from before to after the intervention? Were statistical tests done that provided p values for the pre-to-post changes?
	11. Were outcome measures of interest taken multiple times before the intervention and multiple times after the intervention (i.e., did they use an interrupted time-series design)?
	12. If the intervention was conducted at a group level (e.g., a whole hospital, a community, etc.) did the statistical analysis take into account the use of individual-level data to determine effects at the group level?
	Overall Quality Rating		Additional Comments (If POOR, please state why):
	*CD, cannot determine; NA, not applicable; NR, not reported References: Quality Assessment Tool for Before-After (Pre-Post) Studies With No Control Group (National institutes of health). https://www.nhlbi.nih.gov/health-topics/study-quality-assessment-tools

## Sheet: Tool 1_final
	ID8			ID9			ID10			ID13			ID30			ID31
	R1	R2	Final	R1	R2	Final	R1	R2	Final	R1	R2	Final	R1	R2	Final	R1	R2	Final
Random sequence generation (selection bias)	Low	High	Unclear	Low	Low	Low	Low	Low	Low	Unclear	Unclear	Unclear	High	High	High	Low	Low	Low
Allocation concealment (selection bias)	Unclear	Unclear	Unclear	Unclear	Low	Low	Low	Low	Low	Unclear	Low	Unclear	Unclear	High	High	Low	Low	Low
Blinding of participants and personnel (performance bias)	Low	Unclear	Unclear	Low	High	Low	High	Unclear	Unclear	Low	High	Unclear	Unclear	High	High	High	Unclear	Unclear
Blinding of outcome assessment (detection bias)	Low	Unclear	Unclear	Unclear	High	Unclear	High	Unclear	Unclear	High	High	High	Unclear	High	High	High	Unclear	Unclear
Incomplete outcome data (attrition bias)	Low	Low	Low	Low	Low	Low	High	Low	High	Unclear	Low	Unclear	Low	Low	Low	Low	Unclear	Unclear
Protection against contamination	Low	Unclear	Low	Unclear	Unclear	Unclear	Unclear	High	Unclear	Unclear	Low	Unclear	High	Low	High	Low	Low	Low
Selective outcome reporting? (reporting bias)	Low	Low	Low	Low	Low	Low	Low	Low	Low	Low	Low	Low	Low	Low	Low	Low	Low	Low
Other caracterictic of risk
Were baseline outcome measurements similar?	Low	Low	Low	Low	Low	Low	Unclear	Unclear	Unclear	Low	Low	Low	Low	High	Low	Low	Low	Low
Were baseline characteristics similar?	Low	Unclear	Unclear	Low	High	Unclear	Unclear	Unclear	Unclear	Unclear	Low	Low	Unclear	Low	Unclear	Low	Low	Low
ID 9
2	To fulfill concealment of allocation, the sealed envelopes were opaque and numbered sequentially"
3

## Sheet: Tool 3 final
	ID6			ID15			ID16			ID21			ID22			ID25			ID27			ID29			ID33			ID34			ID35
	R1	R2	Final	R1	R2	Final	R1	R2	Final	R1	R2	Final	R1	R2	Final	R1	R2	Final	R1	R2	Final	R1	R2	Final	R1	R2	Final	R1	R2	Final	R1	R2	Final
1. Was the study question or objective clearly stated?	Yes	Yes	Yes	Yes	Yes	Yes	Yes	Yes	Yes	Yes	Yes	Yes	Yes	Yes	Yes	Yes	Yes	Yes	Yes	Yes	Yes	Yes	Yes	Yes	Yes	Yes	Yes	Yes	Yes	Yes	Yes	Yes	Yes
2. Were eligibility/selection criteria for the study population prespecified and clearly described?	NR	No	NR	Yes	Yes	Yes	Yes	Yes	Yes	No	NR	NR	Yes	No	Yes	Yes	Yes	Yes	No	Yes	Yes	Yes	Yes	Yes	Yes	Yes	Yes	Yes	Yes	Yes	Yes	Yes	Yes
3. Were the participants in the study representative of those who would be eligible for the test/service/intervention in the general or clinical population of interest?	Yes	CD	Yes	Yes	Yes	Yes	Yes	Yes	Yes	No	NR	NR	NR	CD	CD	Yes	CD	Yes	CD	No	CD	Yes	CD	Yes	Yes	Yes	Yes	Yes	Yes	Yes	Yes	Yes	Yes
4. Were all eligible participants that met the prespecified entry criteria enrolled?	NR	No	NR	Yes	Yes	Yes	No	Yes	No	Yes	NR	NR	CD	CD	CD	Yes	CD	Yes	CD	No	CD	Yes	CD	No	Yes	Yes	Yes	Yes	CD	No	No	No	No
5. Was the sample size sufficiently large to provide confidence in the findings?	NR	No	NR	NR	No	NR	No	No	No	NR	NR	NR	NR	No	NR	No	No	No	No	No	No	No	NR	No	CD	CD	CD	Yes	Yes	Yes	No	No	No
6. Was the test/service/intervention clearly described and delivered consistently across the study population?	Yes	Yes	Yes	Yes	Yes	Yes	Yes	Yes	Yes	Yes	Yes	Yes	No	No	No	Yes	No	CD	Yes	Yes	Yes	Yes	Yes	Yes	Yes	Yes	Yes	Yes	Yes	Yes	Yes	Yes	Yes
7. Were the outcome measures prespecified, clearly defined, valid, reliable, and assessed consistently across all study participants?	Yes	Yes	Yes	Yes	Yes	Yes	Yes	Yes	Yes	No	Yes	Yes	Yes	Yes	Yes	Yes	Yes	Yes	Yes	Yes	Yes	Yes	Yes	Yes	Yes	Yes	Yes	Yes	Yes	Yes	No	Yes	Yes
8. Were the people assessing the outcomes blinded to the participants' exposures/interventions?	NR	CD	CD	NR	CD	CD	CD	CD	CD	CD	CD	CD	NR	CD	CD	CD	CD	CD	CD	CD	CD	CD	CD	CD	CD	CD	CD	CD	NR	CD	CD	CD	CD
9. Was the loss to follow-up after baseline 20% or less? Were those lost to follow-up accounted for in the analysis?	NA	NA	NA	CD	CD	CD	No	Yes	No	Yes	Yes	Yes	Yes	Yes	Yes	Yes	Yes	Yes	Yes	Yes	Yes	Yes	Yes	Yes	No	No	No	CD	No	CD	Yes	Yes	Yes
10. Did the statistical methods examine changes in outcome measures from before to after the intervention? Were statistical tests done that provided p values for the pre-to-post changes?	Yes	Yes	Yes	Yes	Yes	Yes	Yes	Yes	Yes	No	Yes	Yes	Yes	No	Yes	Yes	Yes	Yes	Yes	Yes	Yes	Yes	Yes	Yes	Yes	Yes	Yes	Yes	Yes	Yes	Yes	Yes	Yes
11. Were outcome measures of interest taken multiple times before the intervention and multiple times after the intervention (i.e., did they use an interrupted time-series design)?	NR	No	NR	No	No	No	No	NA	NA	NA	NA	NA	NA	NA	NA	No	NA	NA	NA	CD	CD	No	No	No	No	NA	NA	No	No	No	No	No	No
12. If the intervention was conducted at a group level (e.g., a whole hospital, a community, etc.) did the statistical analysis take into account the use of individual-level data to determine effects at the group level?	NA	NA	NA	NA	NA	NA	NA	NA	NA	NA	NA	NA	NA	NA	NA	No	NA	NA	NA	NA	NA	No	NA	NA	Yes	NA	NA	No	NA	No	No	NA	NA
Overall Quality Rating	Fair	Fair	Fair	Fair	Fair	Fair	Fair	Good	Fair	Poor	Poor	Poor	Fair	Poor	Fair	Fair	Fair	Fair	Fair	Fair	Fair			Good	Fair	Fair	Fair	Good	Good	Good	Fair	Fair	Fair
*CD, cannot determine; NA, not applicable; NR, not reported References: Quality Assessment Tool for Before-After (Pre-Post) Studies With No Control Group (National institutes of health). https://www.nhlbi.nih.gov/health-topics/study-quality-assessment-tools

## Sheet: Tool 1 Reasons
Study ID	8
Author	McNulty, Cliodna A M and Syeda, Rowshonara B and Brown, Carla L and Bennett, C Verity and Schofield, Behnaz and Allison, David G and Verlander, Neville Q and Francis, Nick
Title of study	Peer-education as a tool to educate on antibiotics, resistance and use in 16 18-year-olds: A feasibility study
Risk of bias assessment			Location in text pg & fig/table
Domain	Review authors’ judgement	Description as stated in report/paper
	Low risk- High risk -Unclear
Random sequence generation (selection bias)	Low	School Recruitment	Pg 12
Allocation concealment (selection bias)	Unclear	Section 4.4 and 4.5	Pg 12
Blinding of participants and personnel (performance bias)	Low	Section 4.6	Pg 13
Blinding of outcome assessment (detection bias)	Low	Section 4.9	Pg 14
Incomplete outcome data (attrition bias)	Low	Section 2.2	Pg 5
Protection against contamination	Low	Table 1	Pg 5
Selective outcome reporting? (reporting bias)	Low	Section 2	Pg 2
Other caracterictic of risk
Were baseline outcome measurements similar?	Low	Fig 1 (a) and (b)	Pg 3 & 4
Were baseline characteristics similar?	Low	Section 2.1 and 2.2	Pg 2 & 5
Study ID	9
Author	Aboalshamat K Halwani R, Bitan A, Alansari R, Khayat A and Aboalshamat, Khalid and Khayat, Amjad and Halwani, Ragheb and Bitan, Ammar and Alansari, Ryyan
Title of study	The effects of gamification on antimicrobial resistance knowledge and its relationship to dentistry in Saudi Arabia: a randomized controlled trial
Risk of bias assessment			Location in text pg & fig/table
Domain	Review authors’ judgement	Description as stated in report/paper
	Low risk- High risk -Unclear
Random sequence generation (selection bias)	Low	"Using a single-blinded parallel group randomized controlled trial design", "This study was conducted using a single-blinded parallel group RCT design"	P. 1, 2
Allocation concealment (selection bias)	Unclear
Blinding of participants and personnel (performance bias)	Low	"Using a single-blinded parallel group randomized controlled trial design", "This study was conducted using a single-blinded parallel group RCT design"	P. 1, 2
Blinding of outcome assessment (detection bias)	Unclear
Incomplete outcome data (attrition bias)	Low	"After randomization, there were 46 participants in SG and 47 participants in CG. All of the participants an- swered the T1, T2, and T3 questionnaires, with no drop- outs, as shown in Fig. 3. In addition, there were no missing values."	P. 5
Protection against contamination	Unclear	Relevant to only clinical trials not this type of interventions!
Selective outcome reporting? (reporting bias)	Low	Results section	P. 5
Other caracterictic of risk
Were baseline outcome measurements similar?	Low	"Table 3 shows the difference in total knowledge scores between T1, T2, and T3. The t-test analyses showed that the improvements in scores from T1 to T2 were not sig- nificantly different between the SG and the CG (t (89.408) = − 1.89, p = 0.062). However, the reduction of total knowledge scores from T2 to T3 was significantly greater in the CG than in the SG (t (90.967) = − 3.252, p = 0.002). Al…	P. 5
Were baseline characteristics similar?	Low	Methods section	P. 2-5
Study ID	10
Author	Sarah Wilding, Virpi Kettu, Wendy Thompson, Philip Howard, Lars J.C. Jeuken, Madeleine Pownall, Mark Conner and Jonathan A. T. Sandoe
Title of study	Development and randomized controlled trial of an animated film aimed at reducing behaviours for acquiring antibiotics
Risk of bias assessment			Location in text pg & fig/table
Domain	Review authors’ judgement	Description as stated in report/paper
	Low risk- High risk -Unclear
Random sequence generation (selection bias)	Low	Quote="They were then individually randomized via Qualtrics (1 : 1) to one of two conditions..."	page 3
Allocation concealment (selection bias)	Low	Comment= in the time 1, participants and investigators enrolling participants could not foresee assignment because was used central allocation (web-based) "Qualtrics"	page 3
Blinding of participants and personnel (performance bias)	High	Comment= Probably no blinding
Blinding of outcome assessment (detection bias)	High	Comment= Probably no blinding
Incomplete outcome data (attrition bias)	High	Quote="479 participants watched an animated film and completed the questionnaire at Time 1. Of these, 417 participants also completed the questionnaire at Time 2 and their data could be matched across timepoints." Comment= 12,9% of the participants was data missing in time 2 and the study did not report what proportion was to intervention and control group. Also, it did not analyse this data and …
Protection against contamination	Unclear	Comment=Insufﬁcient information to permit judgement
Selective outcome reporting? (reporting bias)	Low	Comment=all relevant outcomes are reported in the methods section
Other caracterictic of risk
Were baseline outcome measurements similar?	Unclear	Comment= It has no baseline measure of outcome
Were baseline characteristics similar?	Unclear	Comment=characteristics are mentioned in text but no data were presented
Study ID	13
Author	Laurence S. J. Roope1,2,3, Sarah Tonkin-Crine2,4, Natalie Herd5, Susan Michie5, Koen B. Pouwels1,2, Enrique Castro-Sanchez6, Anna Sallis7, Susan Hopkins2,8,9, Julie V. Robotham2,10, Derrick W. Crook2,3,11,12, Tim Peto2,3,11,12, Michele Peters13, Christopher C. Butler2,4, A. Sarah Walker2,3,11† and Sarah Wordsworth1,
Title of study	Reducing expectations for antibiotics in primary care: a randomised experiment to test the response to fear-based messages about antimicrobial resistance.
Risk of bias assessment			Location in text pg & fig/table
Domain	Review authors’ judgement	Description as stated in report/paper
	Low risk- High risk -Unclear
Random sequence generation (selection bias)	Unclear	Respondents were randomised to receive one of three different messages about antibiotics and AMR	Pg 3
Allocation concealment (selection bias)	Unclear	Both survey waves were conducted online using re- spondent panels provided by Survey Sampling Inter- national (SSI). In each wave, SSI was commissioned to obtain 4000 completed responses, representative of the UK adult population in terms of sex, age, ethni- city, and geographic region.	Pg 4
Blinding of participants and personnel (performance bias)	Low	To mitigate self- selection bias, specific project details were not in- cluded in the invitation.	Pg 4
Blinding of outcome assessment (detection bias)	High	The key study limitation is that it relies on how survey respondents claimed they would behave in response to information.	Pg 8
Incomplete outcome data (attrition bias)	Unclear	Table 2	Pg 5
Protection against contamination	Unclear	The recruitemnt was done by SSI and there is no mention how the allocation was done.	Pg 4
Selective outcome reporting? (reporting bias)	Low	The two waves were completely independent, with no respondent overlap.	Pg 4
Other caracterictic of risk
Were baseline outcome measurements similar?	Low	For each randomised message, Wilcoxon’s rank-sum tests were used to ana- lyse whether the distribution of responses differed sig- nificantly between subgroups.	Pg 4
Were baseline characteristics similar?	Unclear
Study ID	30
Author	Haenssgen, Marco J and Xayavong, Thipphaphone and Charoenboon, Nutcha and Warapikuptanun, Penporn and Khine Zaw, Yuzana
Title of study	The Consequences of AMR Education and Awareness Raising: Outputs, Outcomes, and Behavioural Impacts of an Antibiotic-Related Educational Activity in Lao PDR. The Consequences of AMR Education and Awareness Raising: Outputs, Outcomes, and Behavioural Impacts of an Antibiotic-Related Educational Activity in Lao PDR. The Consequences of AMR Education and Awareness Raising: Outputs, Outcomes, and Beh…
Risk of bias assessment			Location in text pg & fig/table
Domain	Review authors’ judgement	Description as stated in report/paper
	Low risk- High risk -Unclear
Random sequence generation (selection bias)	High	Comment - They just included lao adult villagers who were 18 yrs old and above!	Check section 2.2. study population. + Line 3 in section 2.7. data analysis
Allocation concealment (selection bias)	Unclear	Comment - Nothing was mentioned about how the three groups were divided: direct exposure, indirect exposure and no exposure!
Blinding of participants and personnel (performance bias)	Unclear	Comment - Nothing was mentioned about it.
Blinding of outcome assessment (detection bias)	Unclear	Comment - Nothing was mentioned to determine whether assessors were blinded or not
Incomplete outcome data (attrition bias)	Low	"The questionnaire was administered face-to-face using tablet computers with the SurveyCTO software [26]"	P. 6, Section 2.4. Data Collection
Protection against contamination	Unclear
Selective outcome reporting? (reporting bias)	Low		P.9, Section 3. Results
Other caracterictic of risk
Were baseline outcome measurements similar?	Low	Table 6	P. 12
Were baseline characteristics similar?	Unclear	Table 5 shows characteristics of individuals, yet in the beginning none of that was mentioned. They took all adult population in the villages.	P. 10
Study ID	31
Author	Lorna Marie West, Maria Cordina
Title of study	Educational intervention to enhance adherence to short-term use of antibiotics
Risk of bias assessment			Location in text pg & fig/table
Domain	Review authors’ judgement	Description as stated in report/paper
	Low risk- High risk -Unclear
Random sequence generation (selection bias)	Low	Quote= "generating random numbers using a random number generator"	page 195
Allocation concealment (selection bias)	Low	Comment= the unit of allocation was by community pharmacies
Blinding of participants and personnel (performance bias)	High	Comment= Probably no blinding
Blinding of outcome assessment (detection bias)	High	Comment= Probably no blinding
Incomplete outcome data (attrition bias)	Low
Protection against contamination	Low	Comment= the unit of allocation was by community pharmacies and it is unlikely that the group control received the intervention
Selective outcome reporting? (reporting bias)	Low
Other caracterictic of risk
Were baseline outcome measurements similar?	Low
Were baseline characteristics similar?	Low

## Sheet: Tool 3 Reasons
Study ID	6				Study ID	25
Author	R. Ahmed , A. Bashir, J.E.P. Brown, J.A.G. Cox, A.C. Hilton, C.E. Hilton, P.A. Lambert, E. Theodosiou, J.Q. Tritter, S.J. Watkin, T. Worthington				Author	Rabbani, S A and Sridhar, S B and Abazer, D and Ahmed, H S and Usman, H A and Mahtab, A and El-Dahiyat, F
Title of study	The drugs don’t work: evaluation of educational theatre to gauge and influence public opinion on antimicrobial resistance				Title of study	Impact of community-based educational intervention on antibiotic use and resistance awareness among the people living in Ras Al Khaimah, United Arab Emirates
Assessment			Location in text pg & fig/table		Assessment			Location in text pg & fig/table
Domain	Review authors’ judgement	Description as stated in report/paper			Domain	Review authors’ judgement	Description as stated in report/paper
	Yes(No/Other (CD, NR, NA)*					Yes(No/Other (CD, NR, NA)*
1. Was the study question or objective clearly stated?	Yes	"The objectives of the study were to assess the knowledge and understanding of AMR of members of the gen- eral public, and the impact of educational theatre combined with an expert panel on raising awareness of this global issue."	P. 195		1. Was the study question or objective clearly stated?	Yes	Introduction last para	Pg 198
2. Were eligibility/selection criteria for the study population prespecified and clearly described?	NR				2. Were eligibility/selection criteria for the study population prespecified and clearly described?	Yes	People more than 18 years of age, willing to give written informed constent and living in Ras Al Khaimah were included	Pg 198
3. Were the participants in the study representative of those who would be eligible for the test/service/intervention in the general or clinical population of interest?	Yes	"The play was presented on three separate occasions: to school and family audiences at two workshops held at the Birmingham Think Tank Science Museum in April 2017, and to a mainly adult audience at the Cheltenham Science Festival in June 2017."	P. 195		3. Were the participants in the study representative of those who would be eligible for the test/service/intervention in the general or clinical population of interest?	Yes	Study design and sample population	Pg 198
4. Were all eligible participants that met the prespecified entry criteria enrolled?	NR				4. Were all eligible participants that met the prespecified entry criteria enrolled?	Yes	Data collection procedure	Pg 198
5. Was the sample size sufficiently large to provide confidence in the findings?	NR				5. Was the sample size sufficiently large to provide confidence in the findings?	No	Only 100 participants were selected for the study which can't be representative of the entire adult population	Pg 198
6. Was the test/service/intervention clearly described and delivered consistently across the study population?	Yes	"The play was written, produced and presented in collabo- ration with the Hobgoblin Theatre Company, a national touring theatre company specializing in the provision of original edu- cational theatre (visit http://www.hobgoblintheatrecompany. co.uk). The script was developed with reference to the Antibiotics-e-Bug young adult educational resource documents for 15e18-year-old students following UK…	P. 195		6. Was the test/service/intervention clearly described and delivered consistently across the study population?	Yes	Fig 1	Pg 199
7. Were the outcome measures prespecified, clearly defined, valid, reliable, and assessed consistently across all study participants?	Yes	"Audience knowledge, attitudes and opinions on AMR were recorded using paper questionnaires before and after the play. The pre- and post- event questionnaires were assigned with a unique code iden- tifier to ensure that pre- and post-event questionnaires were correctly aligned to the participating individual. The pre-event questionnaire was issued to all individuals upon entry to the events and c…	P.195		7. Were the outcome measures prespecified, clearly defined, valid, reliable, and assessed consistently across all study participants?	Yes	Educational intervention and data collection procedure	Pg 198
8. Were the people assessing the outcomes blinded to the participants' exposures/interventions?	NR				8. Were the people assessing the outcomes blinded to the participants' exposures/interventions?	CD
9. Was the loss to follow-up after baseline 20% or less? Were those lost to follow-up accounted for in the analysis?	NA				9. Was the loss to follow-up after baseline 20% or less? Were those lost to follow-up accounted for in the analysis?	Yes	Ten people not included in the study as they did not complete their post-test. 100 participants completed the study and were included in the final data analysis with a response rate of 91%	Pg 198
10. Did the statistical methods examine changes in outcome measures from before to after the intervention? Were statistical tests done that provided p values for the pre-to-post changes?	Yes	Results section	P. 195, 196		10. Did the statistical methods examine changes in outcome measures from before to after the intervention? Were statistical tests done that provided p values for the pre-to-post changes?	Yes	Data analysis	Pg 198
11. Were outcome measures of interest taken multiple times before the intervention and multiple times after the intervention (i.e., did they use an interrupted time-series design)?	NR				11. Were outcome measures of interest taken multiple times before the intervention and multiple times after the intervention (i.e., did they use an interrupted time-series design)?	No	Data collection procedure	Pg 198
12. If the intervention was conducted at a group level (e.g., a whole hospital, a community, etc.) did the statistical analysis take into account the use of individual-level data to determine effects at the group level?	NA				12. If the intervention was conducted at a group level (e.g., a whole hospital, a community, etc.) did the statistical analysis take into account the use of individual-level data to determine effects at the group level?	No	Results section - results are given for the whole study population and not individually	Pg 198
Overall Quality Rating	Fair	Additional Comments (If POOR, please state why):			Overall Quality Rating	Fair	Additional Comments (If POOR, please state why):
Study ID	15				Study ID	27
Author	Jennifer Hall, Leah Jones, Gail Robertson, Robin Hiley, Dilip Nathwani, Meghan Rose Perry				Author	Mohadeseh Khoshgoftar, Fereshteh Zamani-Alavijeh, Nazila Kasaian, Kiana Shahzamani, Soodabeh Rostami, Zari Nakhodian, Asiyeh Pirzadeh
Title of study	‘The Mould that Changed the World’: Quantitative and qualitative evaluation of children’s knowledge and motivation for behavioural change following participation in an antimicrobial resistance musical				Title of study	The effect of public health educational campaign regarding antibiotic use and microbial resistance on knowledge, attitude, and practice in the Iran
Assessment			Location in text pg & fig/table		Assessment			Location in text pg & fig/table
Domain	Review authors’ judgement	Description as stated in report/paper			Domain	Review authors’ judgement	Description as stated in report/paper
	Yes(No/Other (CD, NR, NA)*					Yes(No/Other (CD, NR, NA)*
1. Was the study question or objective clearly stated?	Yes	"A primary school musical (“The Mould that Changed the World”) was developed as a unique public engagement strategy to combat antimicrobial resistance (AMR)", "The primary school musical “The Mould that Changed the World” was developed with the explicit aim to educate and engage the public about the importance of conserving antibiotics and the concept of AMR"	P. 1, 2		1. Was the study question or objective clearly stated?	Yes
2. Were eligibility/selection criteria for the study population prespecified and clearly described?	Yes	"Participating children in the Scottish school were 9 to 11 years in age whilst pupils in the English school were aged 10 to 11 years old."	P. 4		2. Were eligibility/selection criteria for the study population prespecified and clearly described?	No	Quote="Inclusion criteria included having literate and were willing to participate in the study and exclusion criteria included those who did not want to complete the questionnaire" Comment=It is not clearly described	page 2
3. Were the participants in the study representative of those who would be eligible for the test/service/intervention in the general or clinical population of interest?	CD				3. Were the participants in the study representative of those who would be eligible for the test/service/intervention in the general or clinical population of interest?	CD	Comment=a few information to evaluate this domain.
4. Were all eligible participants that met the prespecified entry criteria enrolled?	CD				4. Were all eligible participants that met the prespecified entry criteria enrolled?	CD	Comment=a few information to evaluate this domain.
5. Was the sample size sufficiently large to provide confidence in the findings?	NR				5. Was the sample size sufficiently large to provide confidence in the findings?	No	Comment= it did not discuss the statistical power and sufficient sample size
6. Was the test/service/intervention clearly described and delivered consistently across the study population?	Yes	Musical development section	P. 3,4		6. Was the test/service/intervention clearly described and delivered consistently across the study population?	Yes	Quote="Educational campaign"	page 3
7. Were the outcome measures prespecified, clearly defined, valid, reliable, and assessed consistently across all study participants?	Yes	"Quantitative data from the questionnaires were collected using Google Documents and ana- lysed using the statistical program R [20]. The impact of the musical on children’s knowledge of antibiotic resistance was analysed using generalised linear models (GLMs) with binomial error distributions using whether or not each question was answered correctly by the pupil as the response variable. We used…	P. 4		7. Were the outcome measures prespecified, clearly defined, valid, reliable, and assessed consistently across all study participants?	Yes	Quote="The validity was assessed by 10 specialists in health education and infectious disease and CVR (Content Validity Ratio)…."	page 2
8. Were the people assessing the outcomes blinded to the participants' exposures/interventions?	NR				8. Were the people assessing the outcomes blinded to the participants' exposures/interventions?	CD	Comment=a few information to evaluate this domain.
9. Was the loss to follow-up after baseline 20% or less? Were those lost to follow-up accounted for in the analysis?	CD	"For the six month follow up, responses were evaluated in 71% (n = 67) of the Scottish children who performed the musical."	P. 7		9. Was the loss to follow-up after baseline 20% or less? Were those lost to follow-up accounted for in the analysis?	Yes
10. Did the statistical methods examine changes in outcome measures from before to after the intervention? Were statistical tests done that provided p values for the pre-to-post changes?	Yes	"We identified which variables explained a significant amount of variation in correct answers by comparing models including and exclud- ing each variable using likelihood ratio tests (using the ‘Anova’ function in the ‘car’ package in R) [21]. The final model fit was checked by calculating the area under the receiving operator characteristic curve (AUC). Results are reported as Odds Ratios (ORs),…	P. 5, 6		10. Did the statistical methods examine changes in outcome measures from before to after the intervention? Were statistical tests done that provided p values for the pre-to-post changes?	Yes	Comment=However, they used paired t-test and participants was not the same in the pre and post-test.
11. Were outcome measures of interest taken multiple times before the intervention and multiple times after the intervention (i.e., did they use an interrupted time-series design)?	No	"Participating children (n = 182), aged 9 to 11 years, were given an online questionnaire in the classroom before rehearsals began and at two weeks post-performance with a six- month evaluation in one school"	P. 1		11. Were outcome measures of interest taken multiple times before the intervention and multiple times after the intervention (i.e., did they use an interrupted time-series design)?	NA
12. If the intervention was conducted at a group level (e.g., a whole hospital, a community, etc.) did the statistical analysis take into account the use of individual-level data to determine effects at the group level?	NA				12. If the intervention was conducted at a group level (e.g., a whole hospital, a community, etc.) did the statistical analysis take into account the use of individual-level data to determine effects at the group level?	NA
Overall Quality Rating	Fair	Additional Comments (If POOR, please state why):			Overall Quality Rating	Fair	Additional Comments (If POOR, please state why):
Study ID	16				Study ID	29
Author	Amy Hai Yan Chan1,2, Rob Horne1*, Helen Lycett3, Eva Raebel3, Jordi Guitart3, Emilie Wildman1,3 and Karen Ang				Author	Vicki L Young1, Mark Berry2, Neville Q Verlander3, Andy Ridgway2 and Cliodna AM McNulty1
Title of study	Changing Patient and Public Beliefs About Antimicrobials and Antimicrobial Resistance (AMR) Using a Brief Digital Intervention				Title of study	Using debate to educate young people in schools about antibiotic use and resistance: A before and after evaluation using a questionnaire survey.
Assessment			Location in text pg & fig/table		Assessment			Location in text pg & fig/table
Domain	Review authors’ judgement	Description as stated in report/paper			Domain	Review authors’ judgement	Description as stated in report/paper
	Yes(No/Other (CD, NR, NA)*					Yes(No/Other (CD, NR, NA)*
1. Was the study question or objective clearly stated?	Yes	This paper reports on a proof-of-principle study about whether misplaced beliefs about antibiotics driving inappropriate demand (high necessity, low concerns) can be changed using a brief, tailored algorithm-based digital intervention.	Pg 2		1. Was the study question or objective clearly stated?	Yes	The aim of this study was to investigate the ability of the debate kit to increase knowledge and awareness of antibi- otic and antibiotic resistance in secondary school students aged 13–16 years.	Pg 282
2. Were eligibility/selection criteria for the study population prespecified and clearly described?	Yes	Adults aged 18 years or over and located in the United Kingdom were eligible for inclusion. There were no exclusion criteria, however, as the intervention consisted of behaviour change messages, a moderate level of English proficiency was required to read and understand the messages.	Pg 2		2. Were eligibility/selection criteria for the study population prespecified and clearly described?	Yes	The e-Bug Antibiotic Resistance debate lesson was deliv- ered in schools by a researcher (MB) in June and July 2016. The lesson was delivered to students in Years 9 and 10, ages 13–16 years.	Pg 282
3. Were the participants in the study representative of those who would be eligible for the test/service/intervention in the general or clinical population of interest?	Yes	This study aimed to recruit 100 participants. Study participants were sampled via two methods to maximise generalisability of the study findings.	Pg 2 & 3		3. Were the participants in the study representative of those who would be eligible for the test/service/intervention in the general or clinical population of interest?	Yes	﻿Secondary schools in three regions across South West England were recruited through convenience sampling to participate.	Pg 282
4. Were all eligible participants that met the prespecified entry criteria enrolled?	No	Very small sample size was selected			4. Were all eligible participants that met the prespecified entry criteria enrolled?	No	﻿Schools were purposively selected to recruit a range of school type, in rural and urban locations. Schools were approached via letter, email and phone call to describe the study in more detail	Pg 282
5. Was the sample size sufficiently large to provide confidence in the findings?	No	Only 100 participants were selected to represent the adult population in UK which is not sufficient			5. Was the sample size sufficiently large to provide confidence in the findings?	No	A total of 235 students took part in the study across the seven schools: 235 students completed the survey and nearly all completed all before and after questions, with 227–235 answering each question. Five teachers were interviewed after the session, one from five of the schools who participated.	Pg 283
6. Was the test/service/intervention clearly described and delivered consistently across the study population?	Yes	Tailoring algorithm	Pg 3		6. Was the test/service/intervention clearly described and delivered consistently across the study population?	Yes	A total of 235 students took part in this study from seven schools of differing types and locations. Therefore, data were collected from a wide range of students. Delivery of the lesson by one researcher ensured a consistent teaching approach was used across the different schools;	Pg 286
7. Were the outcome measures prespecified, clearly defined, valid, reliable, and assessed consistently across all study participants?	Yes	The intervention was a logic algorithm that tailored information to address patients’ beliefs in a personalised way	Pg 3		7. Were the outcome measures prespecified, clearly defined, valid, reliable, and assessed consistently across all study participants?	Yes	Lesson Delivery	Pg 282
8. Were the people assessing the outcomes blinded to the participants' exposures/interventions?	CD				8. Were the people assessing the outcomes blinded to the participants' exposures/interventions?	CD
9. Was the loss to follow-up after baseline 20% or less? Were those lost to follow-up accounted for in the analysis?	No	Participants who completed the study in less than 101 s were excluded and a new participant was recruited as a replacement until the target sample size of 100 participants was reached.	Pg 5 & 6		9. Was the loss to follow-up after baseline 20% or less? Were those lost to follow-up accounted for in the analysis?	Yes	235 students completed the survey and nearly all completed all before and after questions, with 227–235 answering each question.	Pg 283
10. Did the statistical methods examine changes in outcome measures from before to after the intervention? Were statistical tests done that provided p values for the pre-to-post changes?	Yes	The impact of the AMS intervention messages on necessity beliefs, concerns and general perceptions was assessed by calculating the mean score of the questionnaire items pre- and post-intervention and comparing the magnitude and direction of changes for each subscale (necessity, concerns, perceptions), and in aggregate (i.e. to determine overall effect of the intervention). Scores were analysed us…	Pg 5		10. Did the statistical methods examine changes in outcome measures from before to after the intervention? Were statistical tests done that provided p values for the pre-to-post changes?	Yes	Each of the 16 questions and the derived percentage variable were analysed separately. When the outcome was binary, the regression model used was logistic and for the percentage outcome variable it was normal linear. For both sorts of regression, the following modelling procedure was adopted, wherein 5% was taken as the sig- nificance level with P value obtained from the Wald test.	Pg 283
11. Were outcome measures of interest taken multiple times before the intervention and multiple times after the intervention (i.e., did they use an interrupted time-series design)?	No	This impact analysis was conducted for each subscale separately and in aggregate. The aggregate statistic pooled together the effect of the intervention on each of the respective subscales to determine the impact of the intervention overall (see Table 1).	Pg 4		11. Were outcome measures of interest taken multiple times before the intervention and multiple times after the intervention (i.e., did they use an interrupted time-series design)?	No	Students were asked to complete a knowledge question- naire before the lesson began and again immediately after the lesson	Pg 283
12. If the intervention was conducted at a group level (e.g., a whole hospital, a community, etc.) did the statistical analysis take into account the use of individual-level data to determine effects at the group level?	NA				12. If the intervention was conducted at a group level (e.g., a whole hospital, a community, etc.) did the statistical analysis take into account the use of individual-level data to determine effects at the group level?	NA	A total of 235 students took part in the study across the seven schools: 235 students completed the survey and nearly all completed all before and after questions, with 227–235 answering each question. Five teachers were interviewed after the session, one from five of the schools who participated.	Pg 283
Overall Quality Rating	Fair	Additional Comments (If POOR, please state why):			Overall Quality Rating	Good	Additional Comments (If POOR, please state why):
Study ID	21				Study ID	33
Author	Rabia Ahmed, Amreen Bashir, James E.P. Brown, Jonathan A.G. Cox, Anthony C. Hilton, Samantha L. Jordan, Eirini Theodosiou, Tony Worthington				Author	Alexander R Hale1, BSc (Hon), MSc; Vicki Louise Young2, BSc (Hons), PhD; Ann Grand3, BA, PhD; Cliodna Ann Miriam McNulty2, MBBS, FRCPath
Title of study	Aston University’s Antimicrobial Resistance (AMR) Roadshow: raising awareness and embedding knowledge of AMR in key stage 4 learners				Title of study	Can Gaming Increase Antibiotic Awareness in Children? A Mixed-Methods Approach
Assessment			Location in text pg & fig/table		Assessment			Location in text pg & fig/table
Domain	Review authors’ judgement	Description as stated in report/paper			Domain	Review authors’ judgement	Description as stated in report/paper
	Yes(No/Other (CD, NR, NA)*					Yes(No/Other (CD, NR, NA)*
1. Was the study question or objective clearly stated?	Yes	Quote="The AMR roadshow comprised interactive workshops in the disciplines of Microbiology, Pharmacy and Engineering; all of which fed into the overall theme of AMR."	page 2		1. Was the study question or objective clearly stated?	Yes	We aimed to determine the effectiveness, flow, and value of the e-Bug junior games as a resource for increasing antibiotic knowledge and awareness in primary school pupils and receive their suggestions for improvement.	Pg 2
2. Were eligibility/selection criteria for the study population prespecified and clearly described?	No	Comment=paragraph "Participants in the AMR roadshow" shows some aspects but it is not clear			2. Were eligibility/selection criteria for the study population prespecified and clearly described?	Yes	All year, 5 and 6 pupils aged 9-11 years at the primary school and all pupils aged 9-11 years at the summer holiday school had the opportunity to evaluate the games	Pg 4
3. Were the participants in the study representative of those who would be eligible for the test/service/intervention in the general or clinical population of interest?	No	Comment= It is probably not representative			3. Were the participants in the study representative of those who would be eligible for the test/service/intervention in the general or clinical population of interest?	Yes	Recruitment	pg 3
4. Were all eligible participants that met the prespecified entry criteria enrolled?	Yes				4. Were all eligible participants that met the prespecified entry criteria enrolled?	Yes	Recruitment	pg 3
5. Was the sample size sufficiently large to provide confidence in the findings?	NR				5. Was the sample size sufficiently large to provide confidence in the findings?	CD
6. Was the test/service/intervention clearly described and delivered consistently across the study population?	Yes				6. Was the test/service/intervention clearly described and delivered consistently across the study population?	Yes	Figure 1	pg 3
7. Were the outcome measures prespecified, clearly defined, valid, reliable, and assessed consistently across all study participants?	No				7. Were the outcome measures prespecified, clearly defined, valid, reliable, and assessed consistently across all study participants?	Yes	The pregame questionnaire asked 7 simple multiple-choice questions adapted from a previous e-Bug evaluation	Pg 4
8. Were the people assessing the outcomes blinded to the participants' exposures/interventions?	CD				8. Were the people assessing the outcomes blinded to the participants' exposures/interventions?	CD
9. Was the loss to follow-up after baseline 20% or less? Were those lost to follow-up accounted for in the analysis?	Yes				9. Was the loss to follow-up after baseline 20% or less? Were those lost to follow-up accounted for in the analysis?	No	All incomplete answers in section 1 of the questionnaire were marked as wrong for data analysis. Questions with more than 1 answer ticked and incomplete answers in section 2 of the questionnaire were not included in the data analysis	Pg 4
10. Did the statistical methods examine changes in outcome measures from before to after the intervention? Were statistical tests done that provided p values for the pre-to-post changes?	No	Comment=It is not clear because they used a non-parametric method if they reported mean. If the data was not normally distributed why they used mean.			10. Did the statistical methods examine changes in outcome measures from before to after the intervention? Were statistical tests done that provided p values for the pre-to-post changes?	Yes	Quantitative data	Pg 8
11. Were outcome measures of interest taken multiple times before the intervention and multiple times after the intervention (i.e., did they use an interrupted time-series design)?	NA				11. Were outcome measures of interest taken multiple times before the intervention and multiple times after the intervention (i.e., did they use an interrupted time-series design)?	No	Not taken
12. If the intervention was conducted at a group level (e.g., a whole hospital, a community, etc.) did the statistical analysis take into account the use of individual-level data to determine effects at the group level?	NA				12. If the intervention was conducted at a group level (e.g., a whole hospital, a community, etc.) did the statistical analysis take into account the use of individual-level data to determine effects at the group level?	Yes	Quantitative data	Pg 8
Overall Quality Rating	Poor	Additional Comments (If POOR, please state why): It is not clear the eligible criteria, and they do not report sample size. Also, statistical method is not clear why it was used.			Overall Quality Rating	Fair	Additional Comments (If POOR, please state why):
Study ID	22				Study ID	34
Author	Susi Ari Kristina, Nada Nisrina Salsabila, Yulianto Yulianto, Gerhard Fortwengel.				Author	VickiL.Young1 ,AmyCole1,DonnaM.Lecky*,DennisFettis2,BethPritchard2,NevilleQ.Vertander*, Charlotte V. Eley* and Cliodna A. M. McNutty*
Title of study	Effect of didactic educational intervention on improving knowledge of antibiotics use and resistance in Yogyakarta Community				Title of study	A mixed-method evotuotion of peer-education workshops for school- aged children to teach about ontibiotics, microbes and hygiene
Assessment			Location in text pg & fig/table		Assessment			Location in text pg & fig/table
Domain	Review authors’ judgement	Description as stated in report/paper			Domain	Review authors’ judgement	Description as stated in report/paper
	Yes(No/Other (CD, NR, NA)*					Yes(No/Other (CD, NR, NA)*
1. Was the study question or objective clearly stated?	Yes	"This study aimed to evaluate the effects of pharmacist-initiated educational intervention on pro- moting appropriate use of antibiotics and reducing self-medication with antibiotics"	P. 346		1. Was the study question or objective clearly stated?	Yes	Our objectives ore to evaluate the effectiveness of using peer education to improve young people’s knowledge about hygiene and antibiotic use. We will also assess the teacher and peer educator attitudes to running the workshops in their schools.	Pg 2120
2. Were eligibility/selection criteria for the study population prespecified and clearly described?	Yes	"Adults residents living in Yogyakarta were invited to join the course held by Gema Cermat Pharmacists team. Sample respondent were conveniently selected based on willingness to participate in this study"	P. 347		2. Were eligibility/selection criteria for the study population prespecified and clearly described?	Yes	School selection	Pg 2120
3. Were the participants in the study representative of those who would be eligible for the test/service/intervention in the general or clinical population of interest?	NR				3. Were the participants in the study representative of those who would be eligible for the test/service/intervention in the general or clinical population of interest?	Yes	Participating secondary schools were responsible for recruitment of pri- mary school classes who would be taugnt by the t2- to 13-year-olds on tne second day of tne workshop. These were local primary schools who fed into the secondary school. Students from these schools were in Year 5 or 6, aged 9—II years. In the inner city school and one of tne rural scnoots, the 12- to 13-year-olds also taught…	Pg 2120
4. Were all eligible participants that met the prespecified entry criteria enrolled?	CD				4. Were all eligible participants that met the prespecified entry criteria enrolled?	No	All secondary schools in these regions were approached via letter and e-mail, or through the county council’s Healthy Living and Learning schools programme. Four sec- ondary scnools—two rural, one in a small town and one inner city scnool— agreed to take part in tne study.	Pg 2120
5. Was the sample size sufficiently large to provide confidence in the findings?	NR				5. Was the sample size sufficiently large to provide confidence in the findings?	Yes	Across the foursecondory schools involved in the study, 1194 ques- tionnaires were completed by 476 students (this included the be- fore, after and retention questionnaires). In seven primary schools and three Year 7 groups, 1576 questionnaires were completed by 589 students.	Pg 2122
6. Was the test/service/intervention clearly described and delivered consistently across the study population?	No	"Courses were consisted of two-hour didactic method and case presentation."	P. 347		6. Was the test/service/intervention clearly described and delivered consistently across the study population?	Yes	Figure 1	Pg 2121
7. Were the outcome measures prespecified, clearly defined, valid, reliable, and assessed consistently across all study participants?	Yes	"A validated questionnaires was used to assess publics’ knowledge and practice towards antibiotics use.", "The pre- and post- educational question- naire consisted of 2 parts assessed participants’ knowledge on antibiotics use and resistance and also practice of antibiotic usage."	P. 347		7. Were the outcome measures prespecified, clearly defined, valid, reliable, and assessed consistently across all study participants?	Yes	Before, after and knowledge-retention questionnaires were used to evalu- ate the effect of tne intervention. Knowledge-retention questionnaires were completed 6 weeks post intervention. Questionnaires were based on previous validated questionnaires used to evaluate the e-Bug re- sources	Pg 2120
8. Were the people assessing the outcomes blinded to the participants' exposures/interventions?	NR				8. Were the people assessing the outcomes blinded to the participants' exposures/interventions?	CD
9. Was the loss to follow-up after baseline 20% or less? Were those lost to follow-up accounted for in the analysis?	NA				9. Was the loss to follow-up after baseline 20% or less? Were those lost to follow-up accounted for in the analysis?	CD	Students who had left any Question blank were omitted from the analysis of that particular section.	Pg 2120
10. Did the statistical methods examine changes in outcome measures from before to after the intervention? Were statistical tests done that provided p values for the pre-to-post changes?	Yes	"Descriptive analysis was performed to describe the data in the form of frequency table. Correct responses in each statement were used to calculate respondents’ knowledge and practice. The results of this study were presented in a form of charts and table to describe the effect of inter- vention on participants’ knowledge and practice improvement. The difference between pre-post intervention was …	P. 348		10. Did the statistical methods examine changes in outcome measures from before to after the intervention? Were statistical tests done that provided p values for the pre-to-post changes?	Yes	Table 2 and 3	Pg 2122 and 2123
11. Were outcome measures of interest taken multiple times before the intervention and multiple times after the intervention (i.e., did they use an interrupted time-series design)?	NA				11. Were outcome measures of interest taken multiple times before the intervention and multiple times after the intervention (i.e., did they use an interrupted time-series design)?	No
12. If the intervention was conducted at a group level (e.g., a whole hospital, a community, etc.) did the statistical analysis take into account the use of individual-level data to determine effects at the group level?	NA				12. If the intervention was conducted at a group level (e.g., a whole hospital, a community, etc.) did the statistical analysis take into account the use of individual-level data to determine effects at the group level?	No
Overall Quality Rating	Fair	Additional Comments (If POOR, please state why):			Overall Quality Rating	Good	Additional Comments (If POOR, please state why):
Study ID	35
Author	CrystalM.Davida,KatherineS.O'Nealb,MichaelJ.Millerc,JeremyL.Johnsond andAnnE.Lloyde
Title of study	A literacy-sensitive approach to improving antibiotic understanding in a community-based setting
Assessment			Location in text pg & fig/table
Domain	Review authors’ judgement	Description as stated in report/paper
	Yes(No/Other (CD, NR, NA)*
1. Was the study question or objective clearly stated?	Yes	This pilot feasibility study was designed to (1) develop and deploy a programme to enhance patient knowledge about antibiotic use; (2) estimate an effect size for whether providing patient education is associated with improve- ments in antibiotic knowledge; and (3) explore the associa- tion between antibiotic knowledge and health literacy.	Pg 394
2. Were eligibility/selection criteria for the study population prespecified and clearly described?	Yes	Participants were required to be >18 years old and English speaking.	Pg 395
3. Were the participants in the study representative of those who would be eligible for the test/service/intervention in the general or clinical population of interest?	Yes	The study purpose and expectations along with the consent documents were explained as a group to sem- inar participants. Sociodemographic characteristics includ- ing age, sex, education level, family income, self-reported health status and a measurement of health literacy (New- est Vital Sign (NVS))1151 were collected in a group setting at baseline.	Pg 395
4. Were all eligible participants that met the prespecified entry criteria enrolled?	No	Only 28 were recruited	Pg 396
5. Was the sample size sufficiently large to provide confidence in the findings?	No	Only 28 were recruited	Pg 396
6. Was the test/service/intervention clearly described and delivered consistently across the study population?	Yes		Pg 395
7. Were the outcome measures prespecified, clearly defined, valid, reliable, and assessed consistently across all study participants?	No	As this study represented initial testing of the instrument, the questionnaire was not pilot-tested prior to dissemina- tion.	Pg 397
8. Were the people assessing the outcomes blinded to the participants' exposures/interventions?	CD
9. Was the loss to follow-up after baseline 20% or less? Were those lost to follow-up accounted for in the analysis?
10. Did the statistical methods examine changes in outcome measures from before to after the intervention? Were statistical tests done that provided p values for the pre-to-post changes?	Yes	For the 19 participants who took both the pre- and post-test, the mean antibiotic knowledge index score sig- nificantly increased by 2.0 points from 10.95 to 12.95 (95% CI: 0.92 to 3.08, P = 0.0011).	Pg 396
11. Were outcome measures of interest taken multiple times before the intervention and multiple times after the intervention (i.e., did they use an interrupted time-series design)?	No
12. If the intervention was conducted at a group level (e.g., a whole hospital, a community, etc.) did the statistical analysis take into account the use of individual-level data to determine effects at the group level?	No
Overall Quality Rating	Poor
